1 **Sex differences in the behavioral and synaptic consequences of a single exposure to**  
2 **cannabinoid at puberty and adulthood**

3

4 Milene Borsoi<sup>1,2</sup>, Antonia Manduca<sup>1,2</sup>, Anissa Bara<sup>1,2</sup>, Olivier Lassalle<sup>1,2</sup>, Anne-Laure  
5 Pelissier-Alicot<sup>1,2,3,4</sup>, Olivier J. Manzoni<sup>1,2\*</sup>.

6

7 <sup>1</sup> Aix Marseille Université, INSERM, INMED, Marseille, France

8 <sup>2</sup>Cannalab, Cannabinoids Neuroscience Research International Associated Laboratory.  
9 INSERM-Indiana University.

10 <sup>3</sup> APHM, CHU Conception, Service de Psychiatrie, 13005 Marseille, France

11 <sup>4</sup> APHM, CHU Timone Adultes, Service de Médecine Légale, 13005 Marseille, France

12

13 \*Corresponding author: Olivier Manzoni, PhD.

14 INMED, INSERM U901,

15 Parc Scientifique de Luminy,

16 163 Avenue de Luminy,

17 BP13 – 13273 Marseille Cedex 09, France.

18 E-mail: [olivier.manzoni@inserm.fr](mailto:olivier.manzoni@inserm.fr)

19

20

21

22 **Abstract**

23 Heavy cannabis consumption among adolescents is associated with significant and lasting  
24 neurobiological, psychological and health consequences that depend on the age of first use.  
25 Chronic exposure to cannabinoid (CB) agonists during adolescence alters social behavior and  
26 prefrontal cortex (PFC) activity in adult rats. However, sex differences on social behavior as  
27 well as PFC synaptic plasticity after acute CB activation remain poorly explored. Here, we  
28 determined the consequences of a single CB activation differently affects PFC in males and  
29 females by assessing social behavior and PFC neuronal and synaptic functions in rats during  
30 pubertal or adulthood periods, 24h after a single in-vivo cannabinoid exposure (SCE). During  
31 puberty, SCE reduced play behavior in females but not males. In contrast, SCE impaired  
32 sociability in both sexes at adulthood. General exploration and memory recognition remained  
33 normal at both ages and both sexes. At the synaptic level, SCE ablated endocannabinoid-  
34 mediated long-term depression (eCB-LTD) in the PFC of females of both ages and  
35 heightened excitability of PFC pyramidal neurons at adulthood, while males were spared. In  
36 contrast, SCE was associated to impaired long-term potentiation in adult males. Together, the  
37 data indicate behavioral and synaptic sex differences in response to a single in-vivo exposure  
38 to cannabinoid at puberty and adulthood.

39

40 **Keywords**

41 Prefrontal cortex, adolescence, cannabis, sexual differences, social behavior, CB1 receptor,  
42 synaptic plasticity, endocannabinoid.

43

## 44 **Introduction**

45 Cannabis is the most frequently and widely used illicit drug among adolescents in developed  
46 countries (Gowing et al., 2015). Heavy cannabis consumption among adolescents is  
47 associated with significant and lasting neurobiological, psychological and health  
48 consequences developing in a dose-dependent fashion which are influenced by age of first  
49 use (Lisdahl et al., 2018; Iede et al., 2017; Levine et al., 2017). Chronic adolescent exposure  
50 to cannabinoids is linked to persistent adverse effects such as poor cognitive and psychiatric  
51 outcomes in adulthood (Levine et al., 2017) and regular cannabis use is associated with  
52 psychosocial impairment even in users without cannabis use disorder (Foster et al., 2017).

53 The primary psychoactive compound of the plant *Cannabis sativa*,  $\Delta$ -9-tetrahydrocannabinol  
54 (THC), as well as the main endogenous cannabinoids (eCB) anandamide and 2-  
55 arachidonoylglycerol, all engage the same primary target in the central nervous system: the  
56 G-protein coupled cannabinoid receptor type 1 (CB1R). The eCB system consists of this and  
57 other receptors, eCB, and the enzymatic machinery for eCB synthesis and degradation (Hu  
58 and Mackie, 2015) and participates in neuronal development and synaptic plasticity in most  
59 brain areas (Gaffuri et al., 2012; Manduca et al., 2012; Lu and Mackie, 2016).

60 Adolescence is a period of profound morphological, neurodevelopmental and behavioral  
61 maturation. Brain volumes, sex steroids, and cortical morphometry all contribute to sex  
62 influences on developmental trajectories which are accompanied by changes in the behavioral  
63 repertoire normally observed in this transitional period from infancy to adulthood. Puberty is  
64 characterized by external physical signs and hormonal alterations whose onset is signaled by  
65 gonadotropin-releasing hormone (Harris and Levine, 2003; Ojeda et al., 2003; Spear, 2000).  
66 This period is elicited through the complex interaction of endogenous and environmental  
67 factors (Sisk and Foster, 2004). Both adolescence and puberty are essential periods of  
68 postnatal brain maturation and are characterized by heightened susceptibility to mental  
69 disorders (Schneider, 2013). Specifically, changes in puberty onset are associated with  
70 increased risk for depression, anxiety (Stice et al., 2001; Kaltiala-Heino et al., 2003) and  
71 substance use (Hummel et al., 2013).

72 While essential for the maturation of adult social and cognitive skills (Casey et al., 2008),  
73 social relationships during adolescence are also implicated in the etiology of neuropsychiatric  
74 and neurodevelopmental disorders (Hankin et al., 1998). Social behavior is sexually  
75 dimorphic in rodents (Vanderschuren et al., 1997) and is, at least in part, controlled by the  
76 eCB system (Wei et al., 2017; Manduca et al., 2016; Manduca et al., 2015). Rather  
77 unsurprisingly, exposure to cannabinoid agonists during adolescence alters social behavior in  
78 adult rats (Schoch et al., 2018; Trezza and Vanderschuren, 2009; Trezza and Vanderschuren,  
79 2008; Schneider et al., 2008).

80 The eCB system is differentially regulated according to sex (Cooper and Craft, 2018).  
81 Hormonal regulation affects eCB activity and sexual differences are apparent in the effects of  
82 cannabinoids. Human studies suggest sex differences in cannabis use (Cutler et al., 2016;  
83 Schepis et al., 2011; Stinson et al., 2006; Gavranidou and Rosner, 2003). In rodents, the  
84 effects of cannabis differ between males and females especially around puberty (Wiley et al.,  
85 2017; Silva et al., 2016; Marusich et al., 2015; Rubino and Parolaro, 2015; Rubino et al.,  
86 2008; Casey et al., 2008).

87 Although the consequences of chronic exposure to cannabinoids during the adolescent period  
88 have been intensely studied (Hoffman et al., 2003; Lupica et al., 2004; Pistis et al., 2004; Liu

89 et al., 2010; Cass et al., 2014; Lovelace et al., 2015a; for review see Zlebnik and Cheer,  
90 2016), the neuronal and behavioral consequences of cannabis initiation, i.e. the first exposure  
91 to the drug, are less clear. A single exposure to THC in-vivo ablates eCB-mediated synaptic  
92 plasticity (i.e. short and long-term depression, LTD) in the accumbens and hippocampus  
93 (Mato et al., 2004) but not hippocampal CA1 long-term potentiation (LTP) (Hoffman et al.,  
94 2007) or eCB-LTD at VTA GABA synapses (Friend et al., 2017). Additionally, acute  
95 cannabinoïd exposure impaired LTP in the ventral subiculum-accumbens pathway (Abush  
96 and Akirav, 2012). Thus, it appears that the effects of a single cannabinoïd exposure greatly  
97 depend on the brain area.

98 An important caveat is that most of the aforementioned studies used adolescent rats which  
99 range in age between 25 and 45 days-old and does not take into account the pubertal period,  
100 i.e., its onset or completion. During this interval, the different phases of adolescence, early,  
101 mid- and late adolescence, are comprised, and are common for males and females. However,  
102 mid-adolescence, when the physical markers of puberty typically appear, differs between  
103 sexes: females reach puberty around post-natal day (PND) 30 to 40 while puberty takes place  
104 in males later at approximately PND 40 to 50 (Burke et al., 2017; Vetter-O'Hagen and Spear,  
105 2012; Schneider, 2008). Thus, based on the developmental profile of the eCB system and the  
106 sensitivity of the pubertal period, we reasoned that two factors, onset of puberty and sex, may  
107 further complexify the situation regarding the effects of acute exposure to exogenous  
108 cannabinoïds. For the present study we therefore decided to focus on pubescent and adult rats  
109 of both sexes who were tested for social and cognitive behaviors as well as neuronal and  
110 synaptic parameters in pyramidal neurons of the PFC 24 h after a single in-vivo cannabinoïd  
111 exposure (SCE).

112

## 113 **Material and Methods**

114

### 115 **Animals**

116 Wistar rats bred in our animal facility were weaned from the mother at postnatal day (PND)  
117 21 and housed in groups of 5 individuals of the same sex with 12 h light/dark cycles and *ad*  
118 *libitum* access to food and water. All experiments were performed in accordance with the  
119 European Communities Council Directive (86/609/EEC) and the United States National  
120 Institutes of Health *Guide for the care and use of laboratory animals*. All behavioral and  
121 electrophysiological experiments were performed on pubescent and adult rats from both  
122 sexes. Take into account that male and female rats do not reach puberty at the same time  
123 (Thomazeau et al., 2014a; Schneider, 2013), experiments in pubescent animals were  
124 performed when male rats were 42-55 days in age and female rats were 30-40 days in age.  
125 Male and female rats were considered adult at PND 90-120. As pubescent males and females  
126 differ in age, the term “age-matched” used in the text refers to rats belonging to the same  
127 period, i.e., puberty or adulthood. All animals were experimentally naïve and used only once.

128

### 129 **Drugs**

130 The CB1/CB2 cannabinoïd agonist WIN55,212-2 (WIN; 2mg/kg) was dissolved in 10%  
131 polyethylene glycol/10% Tween80/saline and injected subcutaneously (s.c.) 24 h before the  
132 behavioral and electrophysiological essays. Control animals (Sham group) received vehicle.

133 Solutions were freshly prepared on the day of the experiment and were administered in a  
134 volume of 2mL/kg for rats weighing <150 g and 1 mL/kg for adult rats. The 2 mg/kg dose  
135 chosen for single exposure is within the 1.2 to 3 mg/kg range that reliably causes behavioral  
136 and neuronal effects when given chronically (Wegener and Koch, 2009; Tagliaferro et al.,  
137 2006).

138

### 139 **Behavioral paradigms**

140 The experiments were performed in a sound attenuated chamber under dim light conditions  
141 (15-25 lux). Animals were handled 2 consecutive days before starting the behavioral tests and  
142 adapted to the room laboratory conditions 1 hour before the tests. They were tested in a 45 x  
143 45 cm arena with  $\pm 2$  cm of wood shavings covering the floor. Drug treatments were  
144 counterbalanced by cage (mates were allocated to different treatment groups). Behavioral  
145 procedures were performed between 10:00 am and 3:00 pm. All sessions were recorded using  
146 a video camera using the Ethovision XT 13.0 video tracking software (Noldus, The  
147 Netherlands) and analysed by a trained observer who was unaware of treatment condition.

148

### 149 **Social behavior in pubescent and adult rats**

150 The social behavior test was performed as previously published (Manduca et al., 2015). The  
151 animals of each pair were equally treated (WIN or vehicle), did not differ more than 10 g in  
152 body weight and were sex and age mates but not cage mates. Pubescent or adult rats of both  
153 sexes were individually habituated to the test cage daily for either 10 (pubescent) or 5 min  
154 (adult) 2 days prior to testing. At the end of the second day of habituation (24 h before the  
155 test), the rats received the treatment. To enhance their social motivation and thus facilitate the  
156 expression of social behaviors, pubescent and adult animals were socially isolated before  
157 testing for 3.5 and 24 h, respectively (Niesink and Van Ree, 1989). The test consisted of  
158 placing two equally treated rats into the test cage for either 15 min (pubescent) or 10 min  
159 (adult).

160 In pubescent rats, we scored: 1/ Social behavior related to play: pouncing (one animal is  
161 soliciting the other to play by attempting to nose or rub the nape of its neck) and pinning (one  
162 animal lying with its dorsal surface on the floor with the other animal standing over it). This  
163 is the most characteristic posture in social play in rats; it occurs when one animal is solicited  
164 to play by its test partner and rotates to its dorsal surface (Panksepp and Beatty, 1980; Trezza  
165 et al., 2010) and 2/ Social behavior unrelated to play (assessed as a measure of general social  
166 interest): sniffing (when the rat sniff, licking, or grooms any part of the body of the test  
167 partner).

168 In adult rats we scored: 1/ Play-related behaviors: pouncing, pinning and boxing and 2/ Social  
169 behaviors unrelated to play: sniffing, social grooming (the rat licks and chews the fur of the  
170 conspecific, while placing its forepaws on the back or the neck of the other rat),  
171 following/chasing (walking or running in the direction of the partner which stays where it is  
172 or moves away), crawling under/over (one animal crawls underneath or over the partner's  
173 body, crossing it transversely from one side to the other), kicking (the rat kicks backwards at  
174 the conspecific with one or both hind paws).

175 The parameters were analysed grouped and considered as *total social exploration*, calculated  
176 as the sum of social behaviors. Aggressive behavior was also scored but not considered in the  
177 calculation of *total social exploration*.

178

### 179 **Novel object recognition test**

180 The test comprised two phases: training (acquisition trial) and test. Each session lasted  
181 5 minutes. During the acquisition trial, the rat was placed into the arena containing two  
182 identical sample objects (A1 and A2) placed near the two corners at either end of one side of  
183 the arena (8 cm from each adjacent wall). Thirty minutes later, the rat returned to the  
184 apparatus containing two objects, one of them was a copy to the object used in the acquisition  
185 trial (A3), and the other one was novel (B). The objects in the test were placed in the same  
186 positions as during the acquisition trial. The positions of the objects in the test and the objects  
187 used as novel or familiar were counterbalanced between the animals. Exploration was scored  
188 when the animal was observed sniffing or touching the object with the nose and/or forepaws.  
189 Sitting on objects was not considered to indicate exploratory behaviour. The apparatus and  
190 the objects were cleaned thoroughly with 50% ethanol between trials to ensure the absence of  
191 olfactory cues. The discrimination ratio was calculated as follow: time spent by each animal  
192 exploring the novel object divided by the total time spent exploring both  
193 objects. Discrimination ratio higher than 0.5 indicates preferable object recognition memory.  
194 Number of rearing and grooming were registered during the acquisition trial.

195

### 196 **Slice preparation**

197 Twenty-four hours after WIN or vehicle administration, rats were anesthetized with  
198 isoflurane and decapitated according to institutional regulations. The brain was sliced (300  
199  $\mu\text{m}$ ) in the coronal plane with a vibratome (Integraslice, Campden Instruments,  
200 Loughborough, UK) in a sucrose-based solution at 4°C (values in mM: 87 NaCl, 75 sucrose,  
201 25 glucose, 5 KCl, 21  $\text{MgCl}_2$ , 0.5  $\text{CaCl}_2$ , and 1.25  $\text{NaH}_2\text{PO}_4$ ). Slices were allowed to recover  
202 for 60 min at  $\pm 32^\circ\text{C}$  in a low calcium artificial cerebrospinal fluid (aCSF) (in mM: 126 NaCl,  
203 2.5 KCl, 2.4  $\text{MgCl}_2$ , 1.2  $\text{CaCl}_2$ , 18  $\text{NaHCO}_3$ , 1.2  $\text{NaH}_2\text{PO}_4$ , and 11 glucose, equilibrated with  
204 95%  $\text{O}_2$ /5%  $\text{CO}_2$ . Slices were maintained at room temperature until recording.

205

### 206 **Electrophysiology**

207 Whole-cell patch-clamp and extra-cellular field recordings were made from layer 5 pyramidal  
208 cells of the prelimbic cortex (mPFC) (Martin et al., 2016b; Kasanetz et al., 2013). For  
209 recording, slices were superfused (1.5–2 mL/min) with aCSF containing picrotoxin (100  $\mu\text{M}$ )  
210 to block  $\text{GABA}_A$  receptors. All experiments were performed at  $32\pm 2^\circ\text{C}$ . To evoke synaptic  
211 currents, 100–200  $\mu\text{s}$  stimuli were delivered at 0.1 Hz through an aCSF-filled glass electrode  
212 positioned dorsal to the recording electrode in layer 5. Patch-clamp recordings were  
213 performed with a potassium gluconate based intracellular solution (values mM: 143  
214 potassium gluconate, 3 NaCl, 1  $\text{MgCl}_2$ , 0.3  $\text{CaCl}_2$ , 1 EGTA, 0.2 cAMP, 0.3 NaGTP, 2  
215 NaATP, 10 HEPES, pH 7.25, osmolarity 290–300 mol/L). Patch pipettes had a resistance  
216 between 3 and 5  $\text{M}\Omega$ . In all experiments cells were clamped at  $-70$  mV (without junction  
217 potential correction). During recordings holding currents, series and input resistances and the



218 membrane time constant ( $\tau$ ) were monitored. If the series resistance exceeded 25 M $\Omega$  or  
219 varied by >20% during the experiment the recording was rejected.

220 Current-voltage ( $I$ - $V$ ) curves were made by a series of hyperpolarizing to depolarizing  
221 current steps immediately after breaking into the cell. Membrane resistance was estimated  
222 from the  $I$ - $V$  curve around resting membrane potential (Thomazeau et al., 2014).

223 For extracellular field experiments, the recording pipette was filled with aCSF. The  
224 glutamatergic nature of the field excitatory postsynaptic potential (fEPSP) was systematically  
225 confirmed at the end of the experiments using the ionotropic glutamate receptor antagonist 6-  
226 cyano-7-nitroquinoxaline-2,3-dione (CNQX, 20  $\mu$ M), that specifically blocked the synaptic  
227 component without altering the non-synaptic component (data not shown). Example EPSPs  
228 and fEPSPs are single sweeps from the indicated time points, for clarity the stimulation  
229 artefact was removed from the fEPSP.

230

### 231 **Data analysis**

232 The magnitude of plasticity was calculated 35–40 min after and compared to the average of  
233 baseline response. sEPSCs were analyzed with Axograph X (Axograph). Statistical analysis  
234 of data was performed with Prism 6 (GraphPad Software) using tests indicated in the main  
235 text after outlier subtraction (Grubb's test). Graphical values are given as mean $\pm$ SEM and table  
236 values are given as median and interquartiles ranges. Statistical significance was set at  $p$ <0.05  
237 (two-tailed).

238

### 239 **Results**

240

#### 241 ***Single exposure to WIN alters social behavior in a sex- and age-dependent manner***

242 We compared distinct behavioral elements related to the social repertoire of rodents in male  
243 and female rats at different ages (puberty and adulthood) previously exposed to a single dose  
244 (2 mg/kg) of the synthetic cannabinoid agonist WIN55,212-2 (WIN). In contrast with  
245 previous studies where animals were tested shortly after WIN administration, i.e. 30 min  
246 after 0.1–1 mg/kg (Trezza and Vanderschuren, 2008a), 0.3 mg/kg (Trezza and  
247 Vanderschuren, 2008b) and 1.2 mg/kg (Schneider et al., 2008), the behavioral and synaptic  
248 tests were performed 24 h after WIN administration to take advantage of WIN's short half-  
249 life of terminal elimination (5h) (Valiveti et al., 2004).

250 At puberty, male rats exhibited normal social play behavior 24 h after SCE: the number of  
251 pouncing (Fig. 1A:  $U=44$ ,  $p=0.696$ , Mann-Whitney  $U$ -test) and pinning (Fig. 1C:  $U=42$ ,  
252  $p=0.588$ , Mann-Whitney  $U$ -test) behaviors were unaltered. Accordingly, the total time spent  
253 exploring the partner during the test was unaffected (Fig. 1E:  $U=42$ ,  $p=0.602$ , Mann-Whitney  
254  $U$ -test). In contrast, female rats at this same age showed significant reduction on parameters  
255 related to play behavior evidenced by a marked reduction in the number of play solicitations,  
256 i.e., pouncing (Fig. 1B:  $U=13.5$ ,  $p=0.008$ , Mann-Whitney  $U$ -test) and play responses, i.e.,  
257 pinning (Fig. 1D:  $U=9$ ,  $p=0.001$ , Mann-Whitney  $U$ -test) observed 24 h after WIN  
258 administration. On the other hand, the total time spent exploring the social partner was

259 comparable to that of the Sham group (Fig. 1F:  $U=27$ ,  $p=0.156$ , Mann-Whitney  $U$ -test),  
260 indicating a specific impairment on social play behavior in pubescent females.

261 In contrast to pubescent rats, both male and female adult rats showed reduced social interest  
262 24 h after SCE. Adult male rats administered WIN presented reduced general social  
263 exploration (Fig. 2A:  $U=7$ ,  $p=0.003$ , Mann-Whitney  $U$ -test) as well as reduced sniffing  
264 exploration (Fig. 2C:  $U=3.5$ ,  $p<0.001$ , Mann-Whitney  $U$ -test) compared to the Sham group.  
265 Similarly, adult cannabinoid-exposed females had less social contact (Fig. 2B:  $U=14.5$ ,  
266  $p=0.007$ , Mann-Whitney  $U$ -test) and sniffing events (Fig. 2D:  $U=15.5$ ,  $p=0.010$ , Mann-  
267 Whitney  $U$ -test) with congeners. In addition, SCE did not elicit aggressive behavior in any of  
268 the tested groups (data not shown).

269 Together, these data show that during puberty, SCE is sufficient to alter social behavior in a  
270 sex-specific manner: play behavior was specifically reduced in females while males were  
271 spared. In adults, SCE caused a general impairment in sociability, exhibited by a reduced  
272 number of events related to general exploration and sniffing in both male and female rats.

273 Importantly, we showed that the low socialization observed in pubescent female rats and in  
274 adult rats of both sexes was unlikely due to an impaired exploration since behavioral  
275 parameters unrelated to cognition but linked to general exploration and emotionality, as  
276 rearing and grooming occurrences, were unchanged 24 h after SCE (Table 1).

277

### 278 *Intact memory recognition in pubescent and adult rats of both sexes after single* 279 *cannabinoid exposure*

280 In humans (Walsh et al., 2017) and rodents (Wegener et al., 2008; Han et al., 2012;  
281 Galanopoulos et al., 2014), cannabinoids rapidly impair recent memory. Social behavior  
282 requires emotional control and cognitive abilities (Trezza et al., 2014). Thus, we used the  
283 novel object recognition test to evaluate the consequences of SEC on rats of our sex and age  
284 groups. 24 h after SCE, pubescent male (Fig. 3A:  $U=17$ ,  $p=0.999$ , Mann-Whitney  $U$ -test) and  
285 female (Fig. 3B:  $U=52$ ,  $p=0.682$ , Mann-Whitney  $U$ -test) rats presented normal short-term  
286 memory. Furthermore, discrimination indexes were similar in both adult male and female  
287 Sham- and WIN-treated rats (Fig. 3C: male,  $U=29.5$ ,  $p=0.557$ ; Fig. 3D: female,  $U=15$ ,  
288  $p=0.755$ ; Mann-Whitney  $U$ -test). Importantly, the total time spent exploring the objects  
289 during the acquisition trial was not altered in any of the tested groups (Pubescent Males:  
290 Sham vs. WIN,  $U=31$ ,  $p=0.277$ ; Pubescent Females: Sham vs. WIN,  $U=42$ ,  $p=0.292$ ; Adult  
291 Males: Sham vs. WIN,  $U=31$ ,  $p=0.673$ ; Adult Females: Sham vs. WIN,  $U=5$ ,  $p=0.082$ ; Mann-  
292 Whitney  $U$ -test; data not shown).

293

### 294 *Single in-vivo cannabinoid exposure leads to sex-specific ablation of prefrontal eCB* 295 *plasticity*

296 The central position of the PFC and eCB system in the regulation of social behavior and the  
297 important role of synaptic plasticity in this structure in mediating experience-dependent  
298 adaptations are well-documented (for review see Araque et al., 2017). At the synaptic level,  
299 activity-dependent plasticity in the PFC – including eCB-mediated long-term depression  
300 (LTD) and NMDAR-mediated long-term potentiation (LTP) – is a common target in animal  
301 models of neuropsychiatric diseases (Scheyer AF et al., 2017). We compared the LTD



302 mediated by the eCB system (eCB-LTD) in the PFC between Sham- and WIN-treated rats of  
303 both sexes at different ages, specifically pubescence and adulthood.

304 Low-frequency stimulation of layer V PFC synapses induced comparable LTD in both  
305 control and cannabinoid-exposed pubescent male rats (Fig. 4A: Sham:  $t_{(6)}=5.596$ ,  $p=0.001$ ;  
306 WIN:  $t_{(4)}=3.190$ ,  $p=0.033$ ; Paired  $t$ -test). Similar results were observed in adult male with or  
307 without prior in-vivo cannabinoid exposure (Fig. 4B: Sham,  $t_{(6)}=3.116$ ,  $p=0.020$ ; WIN,  
308  $t_{(6)}=2.787$ ,  $p=0.031$ ; Paired  $t$ -test). In contrast to what we observed in male mouse  
309 hippocampus and accumbens in a previous study (Mato et al., 2004), it appears that in the  
310 male rat PFC, eCB-LTD is not affected 24 h after in-vivo cannabinoid administration.  
311 Strikingly, eCB-LTD was ablated in PFC slices obtained from female rats in both age groups.  
312 Figure 4C shows the lack of LTD in PFC slices from cannabinoid-treated pubescent (Sham,  
313  $t_{(4)}=5.021$ ,  $p=0.007$ ; WIN,  $t_{(4)}=1.129$ ,  $p=0.322$ ; Paired  $t$ -test) and adult female rats (Fig. 4D:  
314 Sham,  $t_{(4)}=2.979$ ,  $p=0.040$ ; WIN,  $t_{(7)}=1.003$ ,  $p=0.349$ ; Paired  $t$ -test).

315

### 316 *Age- and sex-dependent ablation of LTP after in-vivo single exposure to cannabinoid*

317 Considering that the extensive repertoire of synaptic plasticity expressed by medial PFC  
318 synapses is sensitive to various regimen of exposure to drugs of abuse (Kassanetz et al. 2010;  
319 Cannady et al., 2017, Renard et al., 2016; Lovelace et al., 2015; van Huijstee and  
320 Mansvelter, 2014) we assessed a second type of plasticity in the PFC which is frequently  
321 related to endophenotypes of neuropsychiatric disorders (Labouesse et al. 2016; Manduca et  
322 al., 2017; Neuhofer et al., 2015; Iafrati et al., 2016; Thomazeau et al., 2014), the NMDAR-  
323 dependent LTP (NMDAR-LTP). NMDAR-LTP was ablated in adult male rats while  
324 pubescent males were spared. Figures 5A-B show comparable LTP between Sham and  
325 cannabinoid-treated pubescent male rats (Fig. 5A: Sham,  $t_{(6)}=9.676$ ,  $p<0.001$ ; WIN,  
326  $t_{(7)}=3.677$ ,  $p=0.007$ ; Paired  $t$ -test), but not in adult male rats (Fig. 5B: Sham,  $t_{(8)}=5.560$ ,  
327  $p<0.001$ ; WIN,  $t_{(6)}=2.062$ ,  $p=0.084$ ; Paired  $t$ -test). In contrast, in both age groups, NMDAR-  
328 LTP was comparable in Sham and cannabinoid-treated female rats: both pubescent (Fig. 5C:  
329 Sham,  $t_{(6)}=8.424$ ,  $p<0.001$ ; WIN,  $t_{(6)}=3.369$ ,  $p=0.015$ ; Paired  $t$ -test) and adult rats (Fig. 5D:  
330 Sham,  $t_{(4)}=4.349$ ,  $p=0.012$ ; WIN,  $t_{(7)}=3.133$ ,  $p=0.016$ ; Paired  $t$ -test) had normal NMDAR-  
331 LTP 24 h following in-vivo cannabinoid exposure.

332

### 333 *Single in-vivo exposure to WIN causes age- and sex-specific modifications in intrinsic* 334 *pyramidal neuron properties*

335 Independent of sex, all recorded PFC neurons in pubescent rats showed similar membrane  
336 reaction profiles in response to a series of somatic current steps 24 h after SCE (Fig. 6A:  
337 Male,  $F_{(\text{interaction}10,440)}=1.551$ ,  $p=0.118$ ; Fig. 6B: Female,  $F_{(\text{interaction}10,270)}=0.499$ ,  $p=0.889$ ; two-  
338 way repeated-measures ANOVA). The resting membrane potential (Fig. 6C: Male,  $U=230$ ,  
339  $p=0.627$ ; Fig. 6D: Female,  $U=99.5$ ,  $p=0.854$ ; Mann-Whitney  $U$ -test) as well as the rheobase  
340 (Fig. 6E: Male,  $U=194.5$ ,  $p=0.198$ ; Fig. 6F: Female,  $U=68$ ,  $p=0.115$ ; Mann-Whitney  $U$ -test)  
341 were comparable between Sham and WIN-treated pubescent rats from both sexes. Also, no  
342 changes in excitability were observed since the number of actions potentials in response to  
343 somatic currents steps were comparable in both control and WIN-treated pubescent rats of  
344 both sexes (Fig 6G: Male,  $F_{(\text{interaction}12,492)}=1.189$ ,  $p=0.287$ ; Fig. 6H: Female,  $F_{(\text{interaction}$   
345  $12,324)}=3.624$ ,  $p<0.001$  and  $F_{(\text{treatment}1,27)}=0.389$ ,  $p=0.537$ ; two-way repeated measures  
346 ANOVA).

347 In adult rats however, sex-specific modifications of the excitability of pyramidal neurons  
348 sampled from females were observed following a single in-vivo cannabinoid exposure.  
349 Intrinsic properties of layer V PFC pyramidal neurons were comparable in control and  
350 WIN-treated male rats (I/V curve Fig. 7A:  $F_{(\text{interaction } 9,225)}=1.907$ ,  $p=0.052$ , two-way repeated  
351 measures ANOVA) resting membrane potentials (Fig. 7C:  $U=79$ ,  $p=0.614$ , Mann-Whitney  
352  $U$ -test; rheobase Fig. 7E:  $U=79$ ,  $p=0.614$ , Mann-Whitney  $U$ -test) and the number of action  
353 potentials in response to increasing depolarizing current (Fig. 7G:  $F_{(\text{interaction } 10,250)}=1.417$ ,  
354  $p=0.173$ , two-way repeated measures ANOVA). In striking contrast, a single in-vivo  
355 cannabinoid exposure increased the excitability of PFC pyramidal neurons of adult females.  
356 Thus, we observed an alteration of the membrane reaction profile in response to a series of  
357 somatic current steps (Fig. 7B:  $F_{(\text{interaction } 9,369)}=3.480$ ,  $p<0.001$  and  $F_{(\text{treatment } 1,41)}=5.576$ ,  
358  $p=0.023$ , two-way repeated measures ANOVA) and a marked reduction of the rheobase (Fig.  
359 7F:  $U=137.5$ ,  $p=0.023$ , Mann-Whitney  $U$ -test) accompanying an increased number of action  
360 potential in response to increasing depolarizing current (Fig. 7G:  $F_{(\text{interaction } 10,410)}=3.038$ ,  
361  $p=0.001$  and  $F_{(\text{treatment } 1,41)}=8.041$ ,  $p=0.007$ , two-way repeated measures ANOVA). The resting  
362 membrane potentials were similar to that of control female rats (Fig. 7D,  $U=166.5$ ,  $p=0.124$ ,  
363 Mann-Whitney  $U$ -test). Taken together, these data suggest an overall increase in the  
364 excitability of PFC pyramidal neurons in adult females 24H after SCE.

## 365 Discussion

366 We found that 24 h after a single in-vivo exposure to a cannabinoid, the behavioral, neuronal  
367 and synaptic consequences differ depending on the sex and age of the rat. The current data  
368 indicate a heightened sensitivity of females, especially during pubescence. Specifically,  
369 social behavior and eCB-mediated LTD showed strong deficits in exposed pubescent females  
370 while age-matched male littermates were spared. During adulthood, although reduced social  
371 interactions were observed in both sexes, eCB-mediated synaptic plasticity was ablated  
372 specifically in females and NMDAR-dependent LTP in males.

373 Stimulation of CB1R acutely modulates social play in adolescent rats (Trezza and  
374 Vanderschuren, 2008a). We showed that a single exposure to the synthetic cannabinoid WIN  
375 (2 mg/kg), at a dose reported to acutely decrease social interactions in male rats (Schneider et  
376 al., 2008; Trezza and Vanderschuren, 2008a; Trezza and Vanderschuren, 2008b) has sex-  
377 specific effects as long as 24 h after in-vivo exposure. In the pubescent group, cannabinoid-  
378 treated females exhibited less social play behavior but normal social investigation, while the  
379 sociability of male littermates exposed to WIN was indistinguishable from that of sham rats.  
380 It is important to mention that pubescent female sham rats presented augmented number of  
381 pinnings when compared to age-matched sham males ( $U= 11$ ,  $p=0.001$ , Mann-Whitney test,  
382 data not shown). However, data from the literature show that adolescent males have higher  
383 levels of play behavior than age-matched females (Argue and McCarthy, 2015; Burke et al.,  
384 2017). Our finding may be explained by the difference in the age range in which males and  
385 females were herein tested. Our objective was to verify the effect of acute cannabinoid  
386 exposure in pubescent rats regardless of the onset of the adolescent period. Thus,  
387 considering that in our conditions the play behavior of pubescent females was reduced 24h  
388 after SCE to the same levels of those observed in control males, we may infer that SCE  
389 induced a masculinization of female social play behavior. Interestingly, a recent study  
390 showed that the activation of both CB1 and CB2 receptors (as that observed following  
391 exposure to WIN) is implicated in the masculinization of play behavior of pre-pubertal  
392 female rats (Argue et al., 2017), reinforcing the idea of sex-dependet modulation of social  
393 behaviors that arises early in life. Taken together these data confirm and extend those of Craft  
394 and collaborators (2013) who showed that females are more affected by exogenous  
395 cannabinoids during pubescence than males.

396 Interactions with age-matched congeners during adolescence are crucial for the development  
397 of social competence at adulthood (Douglas et al., 2004; Vanderschuren and Trezza, 2014)  
398 and modification of the rat adolescent social activity alters neurobehavioral parameters  
399 related to pain processing, anxiety, depression and substance abuse (reviewed from Burke et  
400 al., 2017). Thus, future experiments are necessary to determine if the deficits caused by SCE  
401 are long-lasting. Available data do not favor this scenario (Mato et al. 2004). Although sex  
402 differences on cannabinoids' effects on cognition have been reported (Wiley et al., 2017;  
403 Silva et al., 2016; Marusich et al., 2015; Rubino and Parolaro, 2015; Rubino et al., 2008;  
404 Marco et al., 2006), in the present experiments neither locomotion nor novel object  
405 recognition memory were affected in either sex, in favor of the idea that the deficits are not  
406 generalized but rather selective to the social behavior.

407 Gonadal steroids hormones seem to be involved in the sexual differentiation of cannabinoid  
408 sensitivity. Importantly, rat hormonal status (i.e., estrous cycle phase) has been reported to  
409 significantly influence sex differences for cannabinoid effects (revised from Cooper and  
410 Craft, 2018). Indeed, sex differences are not entirely consistent across studies regarding  
411 differences in CB1R mRNA or binding affinity and eCB content (Weed et al., 2016; Castelli

412 [et al., 2014](#); [Riebe et al., 2010](#); [Reich et al., 2009](#)), supporting the important role of hormonal  
413 status in these differences.

414 In contrast to the pubescent groups, a unique exposure to WIN triggered a different response  
415 in adults, since both sexes exhibited perturbed social behaviors. Adolescent rodents are more  
416 sensitive to cannabis than adults ([Renard et al., 2016a](#)). Surprisingly, here we showed that 24  
417 h after SCE, pubescent males did not display behavioral or synaptic changes, while adult rats  
418 did. As cannabinoid doses, administration route, post-administration intervals and rat strains  
419 are not consistent among studies, methodological details may help explaining this  
420 discrepancy. In addition, we cannot rule out a potential protective effect of gonadal hormones  
421 in pubescent rats, since testosterone protects gonadectomized males against THC dependence  
422 ([Marusich et al., 2015b](#)). Thus, considering that this gonadal hormone reaches its peak during  
423 the pubertal period ([Pignatelli et al., 2006](#)), we can speculate that testosterone “protected”  
424 pubescent males from the residual deleterious effect of cannabinoids on social behavior and  
425 PFC synaptic plasticity.

426 Evidence shows that chronic cannabinoid exposure significantly impairs synaptic plasticity  
427 throughout the brain ([Renard et al., 2016a](#); [Araque et al., 2017](#)), while the synaptic plasticity  
428 deficits resulting from acute cannabinoid exposure largely depend on the brain area. For  
429 example, a single exposure to THC (3 mg/kg; 15-20 h before) ablated eCB-mediated synaptic  
430 plasticity in adult mice NAc and hippocampus ([Mato et al., 2004](#)) but not hippocampal CA1  
431 LTP (10 mg/kg; 24 h before) ([Hoffman et al., 2007](#)) or eCB-LTD at VTA GABA synapses  
432 ([Friend et al., 2017](#)). In rats, an acute single injection of WIN (1.2 mg/kg; 24 h before)  
433 impaired LTP in the ventral subiculum-accumbens pathway ([Abush and Akirav, 2012](#)) and in  
434 the Schaffer collateral-CA1 projection (WIN 0.5 mg/kg; 30 min before) ([Abush and Akirav,  
435 2010](#)). In a dose-dependent manner, WIN (0.5-2 mg/kg, i.p.) impaired short-term plasticity  
436 and long-term potentiation at perforant path dentate gyrus synapses in adult rats ([Colangeli et  
437 al., 2017](#)). It is important to highlight that in the aforementioned studies only male rodents  
438 were evaluated.

439 Here, we showed that PFC eCB-LTD was ablated in female rats 24 h after SCE regardless of  
440 the age, but only adult females had altered neuronal excitability. In contrast, male rats of both  
441 ages showed normal eCB-LTD. The eCB signaling machinery is positioned in a way to  
442 influence PFC communication and control other brain regions ([Hill et al., 2007](#); [Domenici et  
443 al., 2006](#)). Sex differences in the eCB system may be involved in these effects. Peak levels of  
444 CB1R expression are reached around mid-adolescence in rats (i.e., PND 34-46), and although  
445 a higher density of CB1R has been shown in males, a higher G-protein activation after CB1R  
446 stimulation is found in adolescent females in several brain areas ([Rubino et al., 2008](#); [Burston  
447 et al., 2010](#)).

448 In rodents, the eCB system sexual differences appear early in development ([Craft et al.,  
449 2013](#)). Sexually dimorphic regulation of synaptic plasticity or intrinsic neuronal activity in  
450 the amygdala ([Bender et al., 2017](#); [Chen et al., 2014](#); [Fendt et al., 2013](#)), hippocampus ([Qi et  
451 al., 2016](#); [Harte-Hargrove et al., 2015](#); [Inoue et al., 2014](#); [Huang and Woolley, 2012](#)) and  
452 PFC ([Li et al., 2016](#); [Nakajima et al., 2014](#)) have been described, but the effects of exogenous  
453 cannabinoids on synaptic plasticity in females as well as putative sex differences in its  
454 expression remain poorly explored. Our results showed that while eCB-LTD was not affected  
455 by cannabinoid exposure in pubescent and adult males, females’ eCB-LTD was ablated.  
456 Multiple molecular mechanisms may help explain the observed sex differences. Female rats  
457 exhibit greater concentrations of the metabolic enzymes monoacylglycerol lipase (MAGL)  
458 and fatty acid amide hydrolase (FAAH) as early as PND 4 compared to males and WIN

459 administration prevents the augmented cell proliferation observed in the amygdala of these  
460 animals when compared to males (Krebs-Kraft et al., 2010). Moreover, CB1R expression  
461 reaches its peak earlier in females (PND 30) than in males (PND 40) (Romero et al., 1997),  
462 whereas at adulthood, CB1R density is lower in the PFC and amygdala of cycling females  
463 (Castelli et al., 2014).

464 While eCB-LTD in both pubescent and adult males was unaffected by SCE, NMDAR-LTP  
465 was selectively ablated in adult males. Pubescent males and females of both ages were  
466 spared. The eCB system controls NMDAR activity through mechanisms involving signaling  
467 pathways and/or direct physical coupling between CB1R and NMDAR NR1 subunits  
468 (Rodríguez-Muñoz et al., 2016). Additionally, gonadal hormonal status influences both LTP  
469 induction and NMDAR function in male rats (Moradpour et al., 2013). Thus, SCE causes  
470 similar behavioral deficits in both male and female rats but triggered different alterations of  
471 PFC synapses.

472 Together, our results reveal behavioral and synaptic sex differences in response to a single in-  
473 vivo exposure to cannabinoid. Further analyses of both electrophysiological function and its  
474 molecular underpinnings associated with the heightened sensitivity of females to a single in-  
475 vivo exposure to cannabinoid may reveal long-term consequences of these early life drug-  
476 induced alterations.

477

#### 478 **Conflict of interest**

479 The authors declare no conflict of interest.

480

#### 481 **Author contributions**

482 MB, AM, AB, APA and OJM designed research; MB, AM, AB and OL performed research;  
483 MB analyzed data; MB, APA and OJM wrote the paper; OJM and APA supervised the entire  
484 project. The authors declare no conflict of interest.

#### 485 **Acknowledgments**

486 The authors are grateful to Dr. Pascale Chavis for helpful discussions, Dr. Andrew Scheyer  
487 for critical reading of the manuscript and to the National Institute of Mental Health's  
488 Chemical Synthesis and Drug Supply Program (Rockville, MD, USA) for providing CNQX.

489

#### 490 **Funding**

491 This work was supported by the Institut National de la Santé et de la Recherche Médicale  
492 (INSERM); Conselho Nacional de Desenvolvimento Científico e Tecnológico (CNPq Brazil,  
493 process 200843/2015-0 to M.B.); L'Agence National de la Recherche (ANR « Cannado ») to  
494 A.L.P.); Fondation pour la Recherche Médicale (Equipe FRM 2015 to O.M.) and the NIH  
495 (R01DA043982 to O.M.).

496

497

498

499

500 **References**

501

502 Abush, H., and Akirav, I. (2010). Cannabinoids modulate hippocampal memory and  
503 plasticity. *Hippocampus* 20, 1126–1138. doi:10.1002/hipo.20711.

504 Abush, H., and Akirav, I. (2012). Short- and long-term cognitive effects of chronic  
505 cannabinoids administration in late-adolescence rats. *PLoS One* 7, e31731.  
506 doi:10.1371/journal.pone.0031731.

507 Araque, A., Castillo, P. E., Manzoni, O. J., and Tonini, R. (2017). Synaptic functions of  
508 endocannabinoid signaling in health and disease. *Neuropharmacology* 124, 13–24.  
509 doi:10.1016/j.neuropharm.2017.06.017.

510 Argue, K. J., and McCarthy, M. M. (2015). Utilization of same- vs. mixed-sex dyads impacts  
511 the observation of sex differences in juvenile social play behavior. *Curr. Neurobiol.* 6,  
512 17–23. doi:10.4172/0975-9042.000117.

513 Argue, K. J., VanRyzin, J. W., Falvo, D. J., Whitaker, A. R., Yu, S. J., and McCarthy, M. M.  
514 (2017). Activation of Both CB1 and CB2 Endocannabinoid Receptors Is Critical for  
515 Masculinization of the Developing Medial Amygdala and Juvenile Social Play  
516 Behavior. *eNeuro* 4. doi:10.1523/ENEURO.0344-16.2017.

517 Bender, R. A., Zhou, L., Vierk, R., Brandt, N., Keller, A., Gee, C. E., et al. (2017). Sex-  
518 Dependent Regulation of Aromatase-Mediated Synaptic Plasticity in the Basolateral  
519 Amygdala. *J. Neurosci. Off. J. Soc. Neurosci.* 37, 1532–1545.  
520 doi:10.1523/JNEUROSCI.1532-16.2016.

521 Burke, A. R., McCormick, C. M., Pellis, S. M., and Lukkes, J. L. (2017). Impact of  
522 adolescent social experiences on behavior and neural circuits implicated in mental  
523 illnesses. *Neurosci. Biobehav. Rev.* 76, 280–300.  
524 doi:10.1016/j.neubiorev.2017.01.018.

525 Burston, J. J., Wiley, J. L., Craig, A. A., Selley, D. E., and Sim-Selley, L. J. (2010). Regional  
526 enhancement of cannabinoid CB<sub>1</sub> receptor desensitization in female  
527 adolescent rats following repeated Delta-tetrahydrocannabinol exposure. *Br. J.*  
528 *Pharmacol.* 161, 103–112. doi:10.1111/j.1476-5381.2010.00870.x.

529 Cannady, R., McGonigal, J. T., Newsom, R. J., Woodward, J. J., Mulholland, P. J., and Gass,  
530 J. T. (2017). Prefrontal Cortex K<sub>Ca</sub>2 Channels Regulate mGlu5-Dependent Plasticity  
531 and Extinction of Alcohol-Seeking Behavior. *J. Neurosci. Off. J. Soc. Neurosci.* 37,  
532 4359–4369. doi:10.1523/JNEUROSCI.2873-16.2017.

533 Casey, B. J., Getz, S., and Galvan, A. (2008). The adolescent brain. *Dev. Rev. DR* 28, 62–77.  
534 doi:10.1016/j.dr.2007.08.003.

535 Cass, D. K., Flores-Barrera, E., Thomases, D. R., Vital, W. F., Caballero, A., and Tseng, K.  
536 Y. (2014). CB1 cannabinoid receptor stimulation during adolescence impairs the



- 537 maturation of GABA function in the adult rat prefrontal cortex. *Mol. Psychiatry* 19,  
538 536–543. doi:10.1038/mp.2014.14.
- 539 Castelli, M. P., Fadda, P., Casu, A., Spano, M. S., Casti, A., Fratta, W., et al. (2014). Male  
540 and female rats differ in brain cannabinoid CB1 receptor density and function and in  
541 behavioural traits predisposing to drug addiction: effect of ovarian hormones. *Curr.*  
542 *Pharm. Des.* 20, 2100–2113.
- 543 Chen, L.-S., Tzeng, W.-Y., Chuang, J.-Y., Cherng, C. G., Gean, P.-W., and Yu, L. (2014).  
544 Roles of testosterone and amygdaloid LTP induction in determining sex differences in  
545 fear memory magnitude. *Horm. Behav.* 66, 498–508.  
546 doi:10.1016/j.yhbeh.2014.07.008.
- 547 Colangeli, R., Pierucci, M., Benigno, A., Campiani, G., Butini, S., and Di Giovanni, G.  
548 (2017). The FAAH inhibitor URB597 suppresses hippocampal maximal dentate  
549 afterdischarges and restores seizure-induced impairment of short and long-term  
550 synaptic plasticity. *Sci. Rep.* 7, 11152. doi:10.1038/s41598-017-11606-1.
- 551 Cooper, Z. D., and Craft, R. M. (2018). Sex-Dependent Effects of Cannabis and  
552 Cannabinoids: A Translational Perspective. *Neuropsychopharmacology* 43, 34–51.  
553 doi:10.1038/npp.2017.140.
- 554 Craft, R. M., Marusich, J. A., and Wiley, J. L. (2013). Sex differences in cannabinoid  
555 pharmacology: a reflection of differences in the endocannabinoid system? *Life Sci.*  
556 92, 476–481. doi:10.1016/j.lfs.2012.06.009.
- 557 Cuttler, C., Mischley, L. K., and Sexton, M. (2016). Sex Differences in Cannabis Use and  
558 Effects: A Cross-Sectional Survey of Cannabis Users. *Cannabis Cannabinoid Res.* 1,  
559 166–175. doi:10.1089/can.2016.0010.
- 560 Domenici, M. R., Azad, S. C., Marsicano, G., Schierloh, A., Wotjak, C. T., Dodt, H.-U., et al.  
561 (2006). Cannabinoid receptor type 1 located on presynaptic terminals of principal  
562 neurons in the forebrain controls glutamatergic synaptic transmission. *J. Neurosci.*  
563 *Off. J. Soc. Neurosci.* 26, 5794–5799. doi:10.1523/JNEUROSCI.0372-06.2006.
- 564 Douglas, L. A., Varlinskaya, E. I., and Spear, L. P. (2004). Rewarding properties of social  
565 interactions in adolescent and adult male and female rats: impact of social versus  
566 isolate housing of subjects and partners. *Dev. Psychobiol.* 45, 153–162.  
567 doi:10.1002/dev.20025.
- 568 Fendt, M., Imobersteg, S., Peterlik, D., Chaperon, F., Mattes, C., Wittmann, C., et al. (2013).  
569 Differential roles of mGlu(7) and mGlu(8) in amygdala-dependent behavior and  
570 physiology. *Neuropharmacology* 72, 215–223.  
571 doi:10.1016/j.neuropharm.2013.04.052.
- 572 Foster, K. T., Arterberry, B. J., Iacono, W. G., McGue, M., and Hicks, B. M. (2017).  
573 Psychosocial functioning among regular cannabis users with and without cannabis use  
574 disorder. *Psychol. Med.*, 1–9. doi:10.1017/S0033291717003361.

- 575 Friend, L., Weed, J., Sandoval, P., Nufer, T., Ostlund, I., and Edwards, J. G. (2017). CB1-  
576 Dependent Long-Term Depression in Ventral Tegmental Area GABA Neurons: A  
577 Novel Target for Marijuana. *J. Neurosci. Off. J. Soc. Neurosci.* 37, 10943–10954.  
578 doi:10.1523/JNEUROSCI.0190-17.2017.
- 579 Gaffuri, A.-L., Ladarre, D., and Lenkei, Z. (2012). Type-1 cannabinoid receptor signaling in  
580 neuronal development. *Pharmacology* 90, 19–39. doi:10.1159/000339075.
- 581 Galanopoulos, A., Polissidis, A., Georgiadou, G., Papadopoulou-Daifoti, Z., Nomikos, G. G.,  
582 Pitsikas, N., et al. (2014). WIN55,212-2 impairs non-associative recognition and  
583 spatial memory in rats via CB1 receptor stimulation. *Pharmacol. Biochem. Behav.*  
584 124, 58–66. doi:10.1016/j.pbb.2014.05.014.
- 585 Gavranidou, M., and Rosner, R. (2003). The weaker sex? Gender and post-traumatic stress  
586 disorder. *Depress. Anxiety* 17, 130–139. doi:10.1002/da.10103.
- 587 Gowing, L. R., Ali, R. L., Allsop, S., Marsden, J., Turf, E. E., West, R., et al. (2015). Global  
588 statistics on addictive behaviours: 2014 status report. *Addict. Abingdon Engl.* 110,  
589 904–919. doi:10.1111/add.12899.
- 590 Han, J., Kesner, P., Metna-Laurent, M., Duan, T., Xu, L., Georges, F., et al. (2012). Acute  
591 cannabinoids impair working memory through astroglial CB1 receptor modulation of  
592 hippocampal LTD. *Cell* 148, 1039–1050. doi:10.1016/j.cell.2012.01.037.
- 593 Hankin, B. L., Abramson, L. Y., Moffitt, T. E., Silva, P. A., McGee, R., and Angell, K. E.  
594 (1998). Development of depression from preadolescence to young adulthood:  
595 emerging gender differences in a 10-year longitudinal study. *J. Abnorm. Psychol.* 107,  
596 128–140.
- 597 Harris, G. C., and Levine, J. E. (2003). Pubertal acceleration of pulsatile gonadotropin-  
598 releasing hormone release in male rats as revealed by microdialysis. *Endocrinology*  
599 144, 163–171. doi:10.1210/en.2002-220767.
- 600 Harte-Hargrove, L. C., Varga-Wesson, A., Duffy, A. M., Milner, T. A., and Scharfman, H. E.  
601 (2015). Opioid receptor-dependent sex differences in synaptic plasticity in the  
602 hippocampal mossy fiber pathway of the adult rat. *J. Neurosci. Off. J. Soc. Neurosci.*  
603 35, 1723–1738. doi:10.1523/JNEUROSCI.0820-14.2015.
- 604 Hill, E. L., Gallopin, T., Férézou, I., Cauli, B., Rossier, J., Schweitzer, P., et al. (2007).  
605 Functional CB1 receptors are broadly expressed in neocortical GABAergic and  
606 glutamatergic neurons. *J. Neurophysiol.* 97, 2580–2589. doi:10.1152/jn.00603.2006.
- 607 Hoffman, A. F., Oz, M., Caulder, T., and Lupica, C. R. (2003). Functional tolerance and  
608 blockade of long-term depression at synapses in the nucleus accumbens after chronic  
609 cannabinoid exposure. *J. Neurosci. Off. J. Soc. Neurosci.* 23, 4815–4820.
- 610 Hoffman, A. F., Oz, M., Yang, R., Lichtman, A. H., and Lupica, C. R. (2007). Opposing  
611 actions of chronic Delta9-tetrahydrocannabinol and cannabinoid antagonists on  
612 hippocampal long-term potentiation. *Learn. Mem. Cold Spring Harb. N* 14, 63–74.  
613 doi:10.1101/lm.439007.

- 614 Hu, S. S.-J., and Mackie, K. (2015). Distribution of the Endocannabinoid System in the  
615 Central Nervous System. *Handb. Exp. Pharmacol.* 231, 59–93. doi:10.1007/978-3-  
616 319-20825-1\_3.
- 617 Huang, G. Z., and Woolley, C. S. (2012). Estradiol acutely suppresses inhibition in the  
618 hippocampus through a sex-specific endocannabinoid and mGluR-dependent  
619 mechanism. *Neuron* 74, 801–808. doi:10.1016/j.neuron.2012.03.035.
- 620 Hummel, A., Shelton, K. H., Heron, J., Moore, L., and van den Bree, M. B. M. (2013). A  
621 systematic review of the relationships between family functioning, pubertal timing  
622 and adolescent substance use. *Addict. Abingdon Engl.* 108, 487–496.  
623 doi:10.1111/add.12055.
- 624 Iafrati, J., Malvache, A., Gonzalez Campo, C., Orejarena, M. J., Lassalle, O., Bouamrane, L.,  
625 et al. (2016). Multivariate synaptic and behavioral profiling reveals new  
626 developmental endophenotypes in the prefrontal cortex. *Sci. Rep.* 6, 35504.  
627 doi:10.1038/srep35504.
- 628 Iafrati, J., Orejarena, M. J., Lassalle, O., Bouamrane, L., Gonzalez-Campo, C., and Chavis, P.  
629 (2014). Reelin, an extracellular matrix protein linked to early onset psychiatric  
630 diseases, drives postnatal development of the prefrontal cortex via GluN2B-NMDARs  
631 and the mTOR pathway. *Mol. Psychiatry* 19, 417–426. doi:10.1038/mp.2013.66.
- 632 Iede, M. A., Nunn, K., Milne, B., and Fitzgerald, D. A. (2017). The consequences of chronic  
633 cannabis smoking in vulnerable adolescents. *Paediatr. Respir. Rev.* 24, 44–53.  
634 doi:10.1016/j.prrv.2016.11.001.
- 635 Inoue, S., Shikanai, H., Matsumoto, M., Hiraide, S., Saito, Y., Yanagawa, Y., et al. (2014).  
636 Metaplastic regulation of the median raphe nucleus via serotonin 5-HT<sub>1A</sub> receptor on  
637 hippocampal synaptic plasticity is associated with gender-specific emotional  
638 expression in rats. *J. Pharmacol. Sci.* 124, 394–407.
- 639 Kaltiala-Heino, R., Marttunen, M., Rantanen, P., and Rimpelä, M. (2003). Early puberty is  
640 associated with mental health problems in middle adolescence. *Soc. Sci. Med.* 1982  
641 57, 1055–1064.
- 642 Kasanetz, F., Lafourcade, M., Deroche-Gamonet, V., Revest, J.-M., Berson, N., Balado, E., et  
643 al. (2013). Prefrontal synaptic markers of cocaine addiction-like behavior in rats. *Mol.*  
644 *Psychiatry* 18, 729–737. doi:10.1038/mp.2012.59.
- 645 Krebs-Kraft, D. L., Hill, M. N., Hillard, C. J., and McCarthy, M. M. (2010). Sex difference in  
646 cell proliferation in developing rat amygdala mediated by endocannabinoids has  
647 implications for social behavior. *Proc. Natl. Acad. Sci. U. S. A.* 107, 20535–20540.  
648 doi:10.1073/pnas.1005003107.
- 649 Levine, A., Clemenza, K., Rynn, M., and Lieberman, J. (2017). Evidence for the Risks and  
650 Consequences of Adolescent Cannabis Exposure. *J. Am. Acad. Child Adolesc.*  
651 *Psychiatry* 56, 214–225. doi:10.1016/j.jaac.2016.12.014.

- 652 Li, K., Nakajima, M., Ibañez-Tallon, I., and Heintz, N. (2016). A Cortical Circuit for  
653 Sexually Dimorphic Oxytocin-Dependent Anxiety Behaviors. *Cell* 167, 60-72.e11.  
654 doi:10.1016/j.cell.2016.08.067.
- 655 Lisdahl, K. M., Sher, K. J., Conway, K. P., Gonzalez, R., Feldstein Ewing, S. W., Nixon, S.  
656 J., et al. (2018). Adolescent brain cognitive development (ABCD) study: Overview of  
657 substance use assessment methods. *Dev. Cogn. Neurosci.*  
658 doi:10.1016/j.dcn.2018.02.007.
- 659 Liu, Z., Han, J., Jia, L., Maillet, J.-C., Bai, G., Xu, L., et al. (2010). Synaptic  
660 neurotransmission depression in ventral tegmental dopamine neurons and  
661 cannabinoid-associated addictive learning. *PloS One* 5, e15634.  
662 doi:10.1371/journal.pone.0015634.
- 663 Lovelace, J. W., Corches, A., Vieira, P. A., Hiroto, A. S., Mackie, K., and Korzus, E.  
664 (2015a). An animal model of female adolescent cannabinoid exposure elicits a long-  
665 lasting deficit in presynaptic long-term plasticity. *Neuropharmacology* 99, 242–255.  
666 doi:10.1016/j.neuropharm.2015.04.034.
- 667 Lovelace, J. W., Corches, A., Vieira, P. A., Hiroto, A. S., Mackie, K., and Korzus, E.  
668 (2015b). An animal model of female adolescent cannabinoid exposure elicits a long-  
669 lasting deficit in presynaptic long-term plasticity. *Neuropharmacology* 99, 242–255.  
670 doi:10.1016/j.neuropharm.2015.04.034.
- 671 Lu, H.-C., and Mackie, K. (2016). An Introduction to the Endogenous Cannabinoid System.  
672 *Biol. Psychiatry* 79, 516–525. doi:10.1016/j.biopsych.2015.07.028.
- 673 Manduca, A., Bara, A., Larrieu, T., Lassalle, O., Joffre, C., Layé, S., et al. (2017).  
674 Amplification of mGlu5-Endocannabinoid Signaling Rescues Behavioral and  
675 Synaptic Deficits in a Mouse Model of Adolescent and Adult Dietary Polyunsaturated  
676 Fatty Acid Imbalance. *J. Neurosci. Off. J. Soc. Neurosci.* 37, 6851–6868.  
677 doi:10.1523/JNEUROSCI.3516-16.2017.
- 678 Manduca, A., Campolongo, P., and Trezza, V. (2012). Cannabinoid modulation of mother-  
679 infant interaction: is it just about milk? *Rev. Neurosci.* 23, 707–722.  
680 doi:10.1515/revneuro-2012-0074.
- 681 Manduca, A., Lassalle, O., Sepers, M., Campolongo, P., Cuomo, V., Marsicano, G., et al.  
682 (2016). Interacting Cannabinoid and Opioid Receptors in the Nucleus Accumbens  
683 Core Control Adolescent Social Play. *Front. Behav. Neurosci.* 10.  
684 doi:10.3389/fnbeh.2016.00211.
- 685 Manduca, A., Morena, M., Campolongo, P., Servadio, M., Palmery, M., Trabace, L., et al.  
686 (2015). Distinct roles of the endocannabinoids anandamide and 2-  
687 arachidonoylglycerol in social behavior and emotionality at different developmental  
688 ages in rats. *Eur. Neuropsychopharmacol. J. Eur. Coll. Neuropsychopharmacol.* 25,  
689 1362–1374. doi:10.1016/j.euroneuro.2015.04.005.
- 690 Martin, H. G. S., Lassalle, O., Brown, J. T., and Manzoni, O. J. (2016). Age-Dependent  
691 Long-Term Potentiation Deficits in the Prefrontal Cortex of the Fmr1 Knockout

- 692 Mouse Model of Fragile X Syndrome. *Cereb. Cortex N. Y. N* 1991 26, 2084–2092.  
693 doi:10.1093/cercor/bhv031.
- 694 Marusich, J. A., Craft, R. M., Lefever, T. W., and Wiley, J. L. (2015a). The Impact of  
695 Gonadal Hormones on Cannabinoid Dependence. *Exp. Clin. Psychopharmacol.* 23,  
696 206–216. doi:10.1037/pha0000027.
- 697 Marusich, J. A., Craft, R. M., Lefever, T. W., and Wiley, J. L. (2015b). The Impact of  
698 Gonadal Hormones on Cannabinoid Dependence. *Exp. Clin. Psychopharmacol.* 23,  
699 206–216. doi:10.1037/pha0000027.
- 700 Mato, S., Chevaleyre, V., Robbe, D., Pazos, A., Castillo, P. E., and Manzoni, O. J. (2004). A  
701 single in-vivo exposure to delta 9THC blocks endocannabinoid-mediated synaptic  
702 plasticity. *Nat. Neurosci.* 7, 585–586. doi:10.1038/nn1251.
- 703 Nakajima, M., Görlich, A., and Heintz, N. (2014). Oxytocin modulates female sociosexual  
704 behavior through a specific class of prefrontal cortical interneurons. *Cell* 159, 295–  
705 305. doi:10.1016/j.cell.2014.09.020.
- 706 Niesink, R. J., and Van Ree, J. M. (1989). Involvement of opioid and dopaminergic systems  
707 in isolation-induced pinning and social grooming of young rats. *Neuropharmacology*  
708 28, 411–418.
- 709 Ojeda, S. R., Prevot, V., Heger, S., Lomniczi, A., Dziedzic, B., and Mungenast, A. (2003).  
710 Glia-to-neuron signaling and the neuroendocrine control of female puberty. *Ann. Med.*  
711 35, 244–255.
- 712 Panksepp, J., and Beatty, W. W. (1980). Social deprivation and play in rats. *Behav. Neural*  
713 *Biol.* 30, 197–206.
- 714 Pignatelli, D., Xiao, F., Gouveia, A. M., Ferreira, J. G., and Vinson, G. P. (2006). Adrenarche  
715 in the rat. *J. Endocrinol.* 191, 301–308. doi:10.1677/joe.1.06972.
- 716 Qi, X., Zhang, K., Xu, T., Yamaki, V. N., Wei, Z., Huang, M., et al. (2016). Sex Differences  
717 in Long-Term Potentiation at Temporoammonic-CA1 Synapses: Potential  
718 Implications for Memory Consolidation. *PloS One* 11, e0165891.  
719 doi:10.1371/journal.pone.0165891.
- 720 Reich, C. G., Taylor, M. E., and McCarthy, M. M. (2009). Differential effects of chronic  
721 unpredictable stress on hippocampal CB1 receptors in male and female rats. *Behav.*  
722 *Brain Res.* 203, 264–269. doi:10.1016/j.bbr.2009.05.013.
- 723 Renard, J., Rushlow, W. J., and Laviolette, S. R. (2016a). What Can Rats Tell Us about  
724 Adolescent Cannabis Exposure? Insights from Preclinical Research. *Can. J.*  
725 *Psychiatry Rev. Can. Psychiatr.* 61, 328–334. doi:10.1177/0706743716645288.
- 726 Renard, J., Vitalis, T., Rame, M., Krebs, M.-O., Lenkei, Z., Le Pen, G., et al. (2016b).  
727 Chronic cannabinoid exposure during adolescence leads to long-term structural and  
728 functional changes in the prefrontal cortex. *Eur. Neuropsychopharmacol. J. Eur. Coll.*  
729 *Neuropsychopharmacol.* 26, 55–64. doi:10.1016/j.euroneuro.2015.11.005.

- 730 Riebe, C. J. N., Hill, M. N., Lee, T. T. Y., Hillard, C. J., and Gorzalka, B. B. (2010).  
731 Estrogenic Regulation of Limbic Cannabinoid Receptor Binding.  
732 *Psychoneuroendocrinology* 35, 1265–1269. doi:10.1016/j.psyneuen.2010.02.008.
- 733 Rodríguez-Muñoz, M., Sánchez-Blázquez, P., Merlos, M., and Garzón-Niño, J. (2016).  
734 Endocannabinoid control of glutamate NMDA receptors: the therapeutic potential and  
735 consequences of dysfunction. *Oncotarget* 7, 55840–55862.  
736 doi:10.18632/oncotarget.10095.
- 737 Romero, J., Garcia-Palomero, E., Berrendero, F., Garcia-Gil, L., Hernandez, M. L., Ramos, J.  
738 A., et al. (1997). Atypical location of cannabinoid receptors in white matter areas  
739 during rat brain development. *Synap. N. Y. N* 26, 317–323. doi:10.1002/(SICI)1098-  
740 2396(199707)26:3<317::AID-SYN12>3.0.CO;2-S.
- 741 Rubino, T., and Parolaro, D. (2015). Sex-dependent vulnerability to cannabis abuse in  
742 adolescence. *Front. Psychiatry* 6, 56. doi:10.3389/fpsy.2015.00056.
- 743 Rubino, T., Vigano', D., Realini, N., Guidali, C., Braida, D., Capurro, V., et al. (2008a).  
744 Chronic delta 9-tetrahydrocannabinol during adolescence provokes sex-dependent  
745 changes in the emotional profile in adult rats: behavioral and biochemical correlates.  
746 *Neuropsychopharmacol. Off. Publ. Am. Coll. Neuropsychopharmacol.* 33, 2760–  
747 2771. doi:10.1038/sj.npp.1301664.
- 748 Rubino, T., Vigano', D., Realini, N., Guidali, C., Braida, D., Capurro, V., et al. (2008b).  
749 Chronic  $\Delta^9$ -Tetrahydrocannabinol During Adolescence Provokes Sex-Dependent  
750 Changes in the Emotional Profile in Adult Rats: Behavioral and Biochemical  
751 Correlates. *Neuropsychopharmacology* 33, 2760. doi:10.1038/sj.npp.1301664.
- 752 Schepis, T. S., Desai, R. A., Cavallo, D. A., Smith, A. E., McFetridge, A., Liss, T. B., et al.  
753 (2011). Gender differences in adolescent marijuana use and associated psychosocial  
754 characteristics. *J. Addict. Med.* 5, 65–73. doi:10.1097/ADM.0b013e3181d8dc62.
- 755 Scheyer AF, Manzoni OJ, and Martin HGS (2017). “The Endocannabinoid System in  
756 Prefrontal Synaptopathies,” in *Endocannabinoids and Lipid Mediators in Brain*  
757 *Functions* (Springer).
- 758 Schneider, M. (2008). Puberty as a highly vulnerable developmental period for the  
759 consequences of cannabis exposure. *Addict. Biol.* 13, 253–263. doi:10.1111/j.1369-  
760 1600.2008.00110.x.
- 761 Schneider, M. (2013). Adolescence as a vulnerable period to alter rodent behavior. *Cell*  
762 *Tissue Res.* 354, 99–106. doi:10.1007/s00441-013-1581-2.
- 763 Schneider, M., Schömig, E., and Leweke, F. M. (2008). Acute and chronic cannabinoid  
764 treatment differentially affects recognition memory and social behavior in pubertal  
765 and adult rats. *Addict. Biol.* 13, 345–357. doi:10.1111/j.1369-1600.2008.00117.x.
- 766 Schoch, H., Huerta, M. Y., Ruiz, C. M., Farrell, M. R., Jung, K. M., Huang, J. J., et al.  
767 (2018). Adolescent cannabinoid exposure effects on natural reward seeking and



- 768 learning in rats. *Psychopharmacology (Berl.)* 235, 121–134. doi:10.1007/s00213-017-  
769 4749-8.
- 770 Silva, L., Black, R., Michaelides, M., Hurd, Y. L., and Dow-Edwards, D. (2016). Sex and age  
771 specific effects of delta-9-tetrahydrocannabinol during the periadolescent period in  
772 the rat: The unique susceptibility of the prepubescent animal. *Neurotoxicol. Teratol.*  
773 58, 88–100. doi:10.1016/j.ntt.2016.02.005.
- 774 Sisk, C. L., and Foster, D. L. (2004). The neural basis of puberty and adolescence. *Nat.*  
775 *Neurosci.* 7, 1040–1047. doi:10.1038/nm1326.
- 776 Spear, L. P. (2000). The adolescent brain and age-related behavioral manifestations.  
777 *Neurosci. Biobehav. Rev.* 24, 417–463.
- 778 Stice, E., Presnell, K., and Bearman, S. K. (2001). Relation of early menarche to depression,  
779 eating disorders, substance abuse, and comorbid psychopathology among adolescent  
780 girls. *Dev. Psychol.* 37, 608–619.
- 781 Stinson, F. S., Ruan, W. J., Pickering, R., and Grant, B. F. (2006). Cannabis use disorders in  
782 the USA: prevalence, correlates and co-morbidity. *Psychol. Med.* 36, 1447–1460.  
783 doi:10.1017/S0033291706008361.
- 784 Tagliaferro, P., Javier Ramos, A., Onaivi, E. S., Evrard, S. G., Lujilde, J., and Brusco, A.  
785 (2006). Neuronal cytoskeleton and synaptic densities are altered after a chronic  
786 treatment with the cannabinoid receptor agonist WIN 55,212-2. *Brain Res.* 1085,  
787 163–176. doi:10.1016/j.brainres.2005.12.089.
- 788 Thomazeau, A., Lassalle, O., Iafrati, J., Souchet, B., Guedj, F., Janel, N., et al. (2014).  
789 Prefrontal deficits in a murine model overexpressing the down syndrome candidate  
790 gene *dyrk1a*. *J. Neurosci. Off. J. Soc. Neurosci.* 34, 1138–1147.  
791 doi:10.1523/JNEUROSCI.2852-13.2014.
- 792 Trezza, V., Baarendse, P. J. J., and Vanderschuren, L. J. M. J. (2010). The pleasures of play:  
793 pharmacological insights into social reward mechanisms. *Trends Pharmacol. Sci.* 31,  
794 463–469. doi:10.1016/j.tips.2010.06.008.
- 795 Trezza, V., Baarendse, P. J. J., and Vanderschuren, L. J. M. J. (2014). On the interaction  
796 between drugs of abuse and adolescent social behavior. *Psychopharmacology (Berl.)*  
797 231, 1715–1729. doi:10.1007/s00213-014-3471-z.
- 798 Trezza, V., and Vanderschuren, L. J. M. J. (2008a). Bidirectional cannabinoid modulation of  
799 social behavior in adolescent rats. *Psychopharmacology (Berl.)* 197, 217–227.  
800 doi:10.1007/s00213-007-1025-3.
- 801 Trezza, V., and Vanderschuren, L. J. M. J. (2008b). Cannabinoid and opioid modulation of  
802 social play behavior in adolescent rats: differential behavioral mechanisms. *Eur.*  
803 *Neuropsychopharmacol. J. Eur. Coll. Neuropsychopharmacol.* 18, 519–530.  
804 doi:10.1016/j.euroneuro.2008.03.001.

- 805 Trezza, V., and Vanderschuren, L. J. M. J. (2009). Divergent effects of anandamide  
806 transporter inhibitors with different target selectivity on social play behavior in  
807 adolescent rats. *J. Pharmacol. Exp. Ther.* 328, 343–350. doi:10.1124/jpet.108.141069.
- 808 Valiveti, S., Hammell, D. C., Earles, D. C., and Stinchcomb, A. L. (2004). Transdermal  
809 delivery of the synthetic cannabinoid WIN 55,212-2: in vitro/in vivo correlation.  
810 *Pharm. Res.* 21, 1137–1145.
- 811 van Huijstee, A. N., and Mansvelder, H. D. (2014). Glutamatergic synaptic plasticity in the  
812 mesocorticolimbic system in addiction. *Front. Cell. Neurosci.* 8, 466.  
813 doi:10.3389/fncel.2014.00466.
- 814 Vanderschuren, L. J. M. J., and Trezza, V. (2014). What the laboratory rat has taught us  
815 about social play behavior: role in behavioral development and neural mechanisms.  
816 *Curr. Top. Behav. Neurosci.* 16, 189–212. doi:10.1007/7854\_2013\_268.
- 817 Vetter-O'Hagen, C. S., and Spear, L. P. (2012). Hormonal and physical markers of puberty  
818 and their relationship to adolescent-typical novelty-directed behavior. *Dev.*  
819 *Psychobiol.* 54, 523–535. doi:10.1002/dev.20610.
- 820 Walsh, Z., Gonzalez, R., Crosby, K., S Thiessen, M., Carroll, C., and Bonn-Miller, M. O.  
821 (2017). Medical cannabis and mental health: A guided systematic review. *Clin.*  
822 *Psychol. Rev.* 51, 15–29. doi:10.1016/j.cpr.2016.10.002.
- 823 Weed, P. F., Filipeanu, C. M., Ketchum, M. J., and Winsauer, P. J. (2016). Chronic  $\Delta$ 9-  
824 Tetrahydrocannabinol during Adolescence Differentially Modulates Striatal CB1  
825 Receptor Expression and the Acute and Chronic Effects on Learning in Adult Rats. *J.*  
826 *Pharmacol. Exp. Ther.* 356, 20–31. doi:10.1124/jpet.115.227181.
- 827 Wegener, N., and Koch, M. (2009). Behavioural disturbances and altered Fos protein  
828 expression in adult rats after chronic pubertal cannabinoid treatment. *Brain Res.* 1253,  
829 81–91. doi:10.1016/j.brainres.2008.11.081.
- 830 Wegener, N., Kuhnert, S., Thiins, A., Roese, R., and Koch, M. (2008). Effects of acute  
831 systemic and intra-cerebral stimulation of cannabinoid receptors on sensorimotor  
832 gating, locomotion and spatial memory in rats. *Psychopharmacology (Berl.)* 198,  
833 375–385. doi:10.1007/s00213-008-1148-1.
- 834 Wei, D., Allsop, S., Tye, K., and Piomelli, D. (2017). Endocannabinoid Signaling in the  
835 Control of Social Behavior. *Trends Neurosci.* 40, 385–396.  
836 doi:10.1016/j.tins.2017.04.005.
- 837 Wiley, J. L., Lefever, T. W., Marusich, J. A., and Craft, R. M. (2017). Comparison of the  
838 discriminative stimulus and response rate effects of  $\Delta$ 9-tetrahydrocannabinol and  
839 synthetic cannabinoids in female and male rats. *Drug Alcohol Depend.* 172, 51–59.  
840 doi:10.1016/j.drugalcdep.2016.11.035.
- 841 Zlebnik, N. E., and Cheer, J. F. (2016). Drug-Induced Alterations of Endocannabinoid-  
842 Mediated Plasticity in Brain Reward Regions. *J. Neurosci.* 36, 10230–10238.  
843 doi:10.1523/JNEUROSCI.1712-16.2016.

844 **Table 1.** Statistical report for general exploration parameters (rearing and grooming) in  
 845 pubescent and adult rats from both sexes 24 h after a single in-vivo exposure to WIN (2  
 846 mg/kg, s.c.). The number of rearing and grooming was counted during the acquisition trial in  
 847 the novel object recognition test. Quartiles, 25 and 75% percentiles; n, number of animals;  
 848 Mann-Whitney *U*-test; ♂ males; ♀ females.

849

|                 |             | Sham   |             |    | WIN    |             |    | <i>p</i> | <i>U</i> |
|-----------------|-------------|--------|-------------|----|--------|-------------|----|----------|----------|
|                 |             | Median | Quartiles   | n  | Median | Quartiles   | n  |          |          |
| <b>Rearing</b>  | ♂ Pubescent | 37.50  | 32.75/46.00 | 10 | 38.00  | 31.00/43.50 | 9  | 0.826    | 42       |
|                 | ♂ Adult     | 35.50  | 25.25/44.00 | 8  | 36.00  | 16.50/40.00 | 9  | 0.524    | 29       |
|                 | ♀ Pubescent | 35.00  | 25.00/40.50 | 9  | 37.00  | 30.50/45.00 | 13 | 0.502    | 48       |
|                 | ♀ Adult     | 22.00  | 19.50/30.50 | 5  | 28.00  | 23.00/44.00 | 7  | 0.162    | 8.5      |
| <b>Grooming</b> | ♂ Pubescent | 0.50   | 0/2.25      | 10 | 2.00   | 1.00/3.00   | 9  | 0.129    | 26.5     |
|                 | ♂ Adult     | 1.00   | 0.25/1.75   | 8  | 1      | 1.00/3.00   | 9  | 0.395    | 26.5     |
|                 | ♀ Pubescent | 1.00   | 0/2.50      | 9  | 1      | 1.00/5.00   | 13 | 0.732    | 53       |
|                 | ♀ Adult     | 2.00   | 0.50/4.50   | 5  | 3.00   | 0/5.00      | 7  | 0.977    | 17       |

850

851 **Figure 1. Sex-specific alteration of play behavior in pubescent rats 24 h after a single in-**  
852 **in-vivo cannabinoid exposure.** 24 h following a single exposure to WIN55,212-2 (WIN, 2  
853 mg/kg, s.c.), pouncing was normal in male pubescent rats (A) in contrast to female littermates  
854 (B) whom displayed a marked reduction in the number of pouncing compared to Sham  
855 animals. 24 h following WIN exposure, pinning was similar to that of Sham animals in males  
856 (C) but was largely reduced in female littermates (D). WIN-exposed rats of both sexes (E,  
857 male and F, female) spent similar time sniffing the congener compared to their respective  
858 Sham groups. Data represent mean  $\pm$  SEM. Scatter dot plot represents a pair of animals.  
859 \* $p < 0.05$ , Mann-Whitney  $U$ -test. ♂ males; ♀ females.

860

861 **Figure 2. Social interactions are diminished in adult rats of both sex 24 h after a single**  
862 **in-vivo cannabinoid exposure.** Adult male (A) and female (B) rats had less social contacts  
863 with their congeners 24 h following a single exposure to WIN. Similarly, sniffing was  
864 reduced in both adult male (C) and female (D) rats 24 h following a single exposure WIN,  
865 compared to control animals. Data represent mean  $\pm$  SEM. Scatter dot plot represents a pair  
866 of animals. \* $p < 0.05$ , Mann-Whitney  $U$ -test. ♂ males; ♀ females.

867

868 **Figure 3. Intact memory discrimination in the novel object recognition test 24 h after**  
869 **single in-vivo cannabinoid exposure in both pubescent and adult male and female rats.**  
870 Discrimination ratio between the novel and familiar objects were similar in male (A) and  
871 female (B) WIN-treated pubescent rats compared to their respective Sham groups. Similarly,  
872 no differences were observed in discrimination ratio in male (C) and female (D) adult rats  
873 treated with WIN. Data represent mean  $\pm$  SEM. Scatter dot plot represents one animal. Mann-  
874 Whitney  $U$ -test. ♂ males; ♀ females.

875

876 **Figure 4. Sex-specific effects of a single in-vivo cannabinoid exposure on PFC eCB-**  
877 **LTD.** Average time-courses of mean fEPSPs showing that low-frequency stimulation  
878 (indicated by arrow) induced LTD at mPFC synapses in both Sham- (white circles,  $n=7$ ) and  
879 WIN- (black circles,  $n=6$ ) exposed pubescent males (A). Similarly, LTD was identical in  
880 Sham- (white circles,  $n=7$ ) and WIN- (black circles,  $n=7$ ) exposed adult males (B). In  
881 contrast, LTD was ablated in mPFC slices obtained from both pubescent (C, Sham, white  
882 circles,  $n=5$ ; WIN, black circles,  $n=5$ ) and adult (D, Sham, white circles,  $n=5$ ; WIN, black  
883 circles,  $n=7$ ) females 24 h after a single exposure to WIN. Adjacent to the time-course figures  
884 individual experiments (white circles) and group average (Sham, gray circles; WIN, black  
885 circles) before (baseline) and after (35-40 min) LTD induction are showed. LTD is present in  
886 WIN-treated male rats at both ages: pubescent (A, on the right) and adulthood (B, on the  
887 right). In contrast, LTD was absent in both pubescent (C, on the right) and adult (D, on the  
888 right) females previously treated with WIN. Error bars indicate SEM,  $n$ = individual rats,  
889 \* $p < 0.05$ , Paired  $t$ -test. ♂ males; ♀ females.

890

891 **Figure 5. Age- and sex-dependent ablation of LTP in the rat PFC 24 h after in-vivo**  
892 **cannabinoid exposure.** Average time-courses of mean fEPSPs showing that theta-burst

893 stimulation (indicated arrow) induced a LTP at mPFC synapses in both Sham- (white circles,  
894 n=7) and WIN- (black circles, n=8) exposed pubescent males (A) but not WIN-treated adults  
895 (B, Sham: white circles, n=10; WIN: black circles, n=7). In contrast, LTP was present in  
896 mPFC slices obtained from both pubescent (C, Sham: white circles, n=7; WIN: black circles,  
897 n=7) and adult (D, Sham: white circles, n=5; WIN: black circles, n=8) WIN-treated females.  
898 Adjacent to the time-course figures are showed individual experiments (white circles) and  
899 group average (Sham, gray circles; WIN, black circles) before (baseline) and after (35-40  
900 min) LTP induction showing that, in males, LTP is present in pubescent (A, on the right) but  
901 not in adults (B, on the right). In contrast, LTP was present in both pubescent (C, on the right)  
902 and adult (D, on the right) females previously treated with WIN. Error bars indicate SEM, n=  
903 individual rats, \*p<0.05, Paired *t*-test. ♂ males; ♀ females.

904

905 **Figure 6. Intrinsic properties of PFC pyramidal neurons are not altered by single in-**  
906 **vivo exposure to cannabinoid in pubescent rats.** Current–voltage plot from visually  
907 identified pyramidal neurons recorded from pubescent rats showing similar cell voltage in  
908 response to current steps between Sham and WIN of both male (A) and female (B) groups.  
909 No change was observed in the resting membrane potential 24 h after WIN treatment in both  
910 male (C) and female (D) pubescent rats. Quantification of neuronal spiking properties  
911 indicated no change in the rheobase of either males (E) or females (F) 24 h after single WIN.  
912 The number of evoked action potentials in response to increasing depolarizing current steps  
913 was similar in Sham and WIN-treated male (G) and female (H) pubescent rats. Males: Sham,  
914 n=15 cells/6 rats; WIN, n=28 cells/10 rats. Females: Sham, n=17 cells/7 rats; WIN, n=13  
915 cells/7 rats. Scatter dot plot represents one cell. Data represent mean ± SEM. ♂ males; ♀  
916 females.

917

918 **Figure 7. Sex-specific alteration of pyramidal neurons' intrinsic properties in adult rats**  
919 **24 h following single in-vivo cannabinoid administration.** Current–voltage plot from  
920 visually identified pyramidal neurons recorded from adult rats showing no difference in cell  
921 voltage in response to current steps between Sham and WIN groups (green symbols) of adult  
922 male rats (A). In contrast, membrane potentials were altered in adult WIN-treated females  
923 compared to control group (B). The resting membrane potentials were similar to that of  
924 control in adult males (C) and females (D) 24 h following single WIN exposure.  
925 Quantification of neuronal spiking properties showed no change in the rheobase of males (E),  
926 but a marked reduction in the female WIN-treated group (F). The number of evoked action  
927 potentials in response to increasing depolarizing current step was similar in Sham and WIN-  
928 treated males (G). In contrast, females showed a higher number of action potentials 24 h after  
929 WIN treatment (H). Male: Sham, n=16 cells/6 rats; WIN, n= 12 cells/5 rats; Female: Sham,  
930 n=16 cells/6 rats; WIN, n=20 cells/7 rats. Scatter dot plot represents one cell. Data represent  
931 mean ± SEM. \*p<0.05, Mann-Whitney test (B), Bonferroni's multiple comparisons test (F).  
932 ♂ males; ♀ females.

♂

A

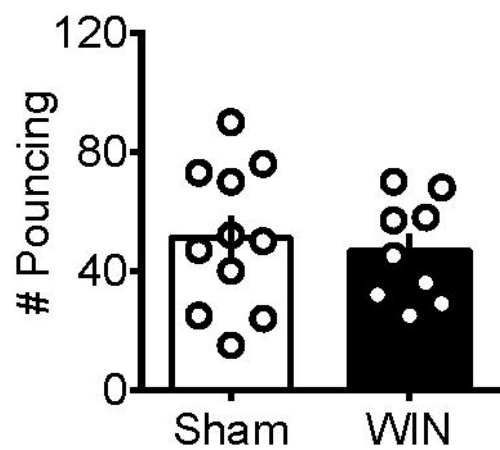

♀

B

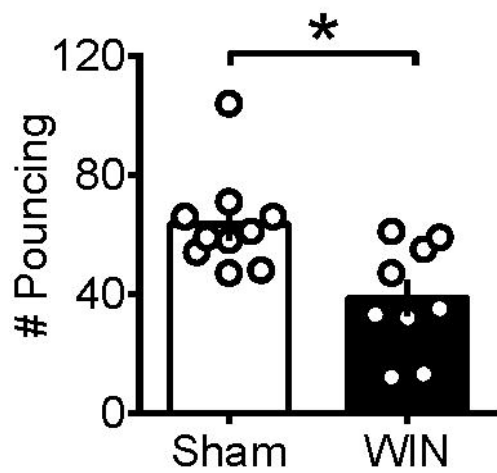

C

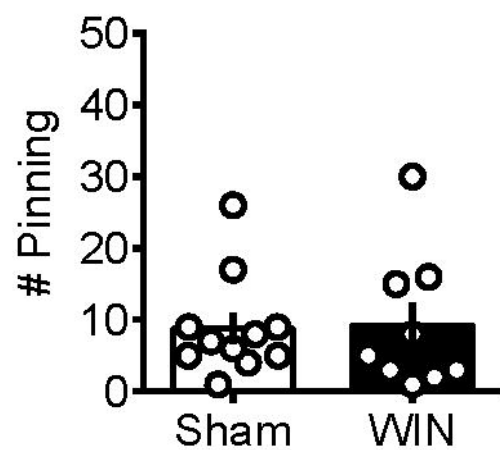

D

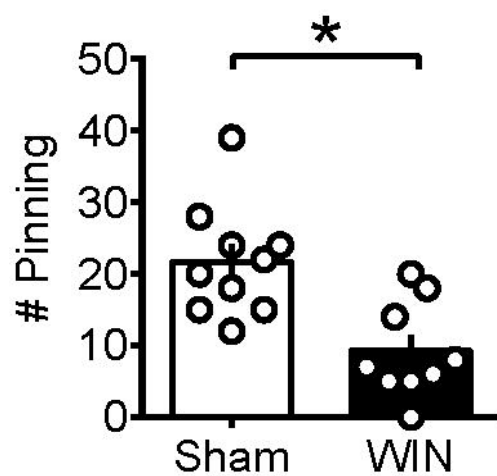

E

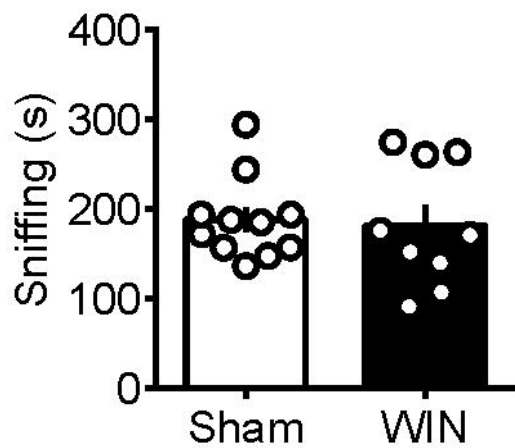

F

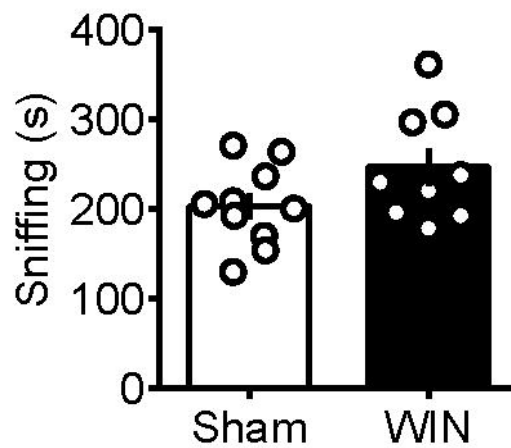



**A****♂**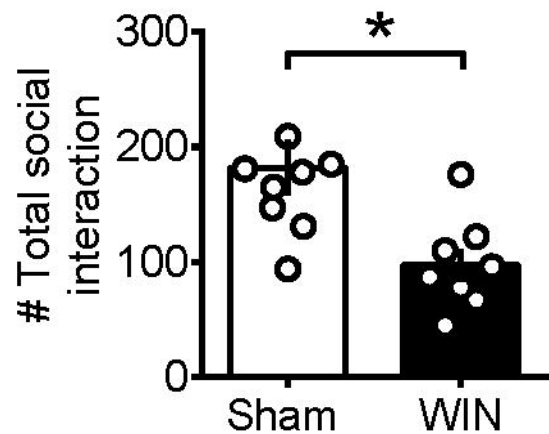**B****♀**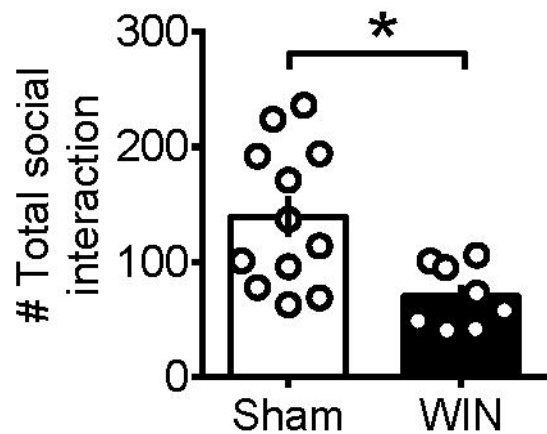**C**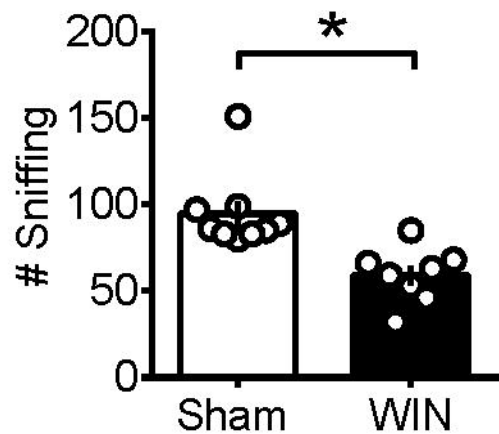**D**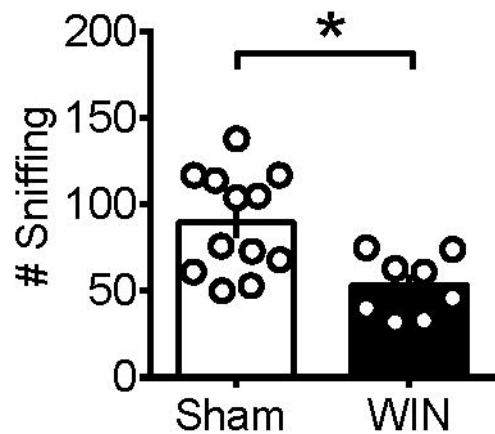

**Pubescents**

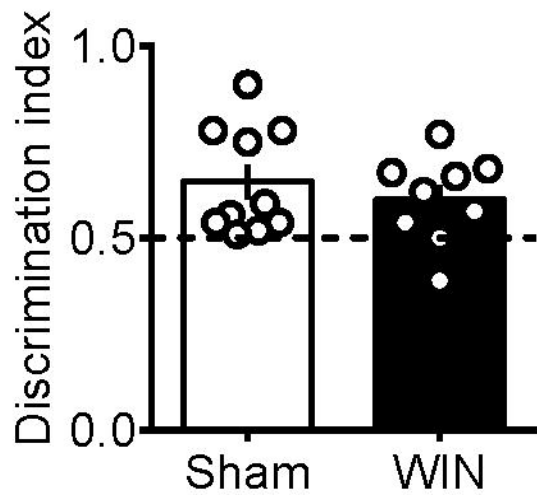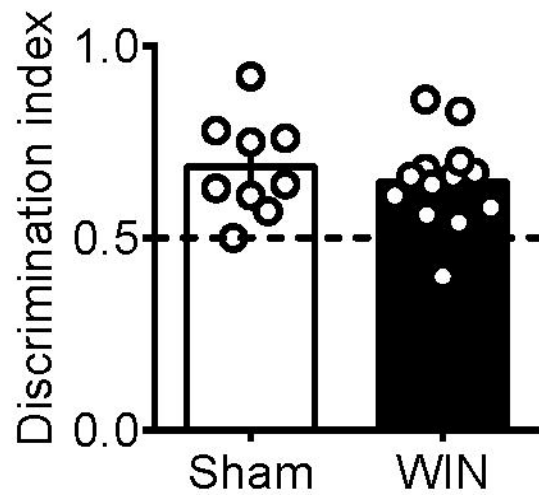

**Adults**

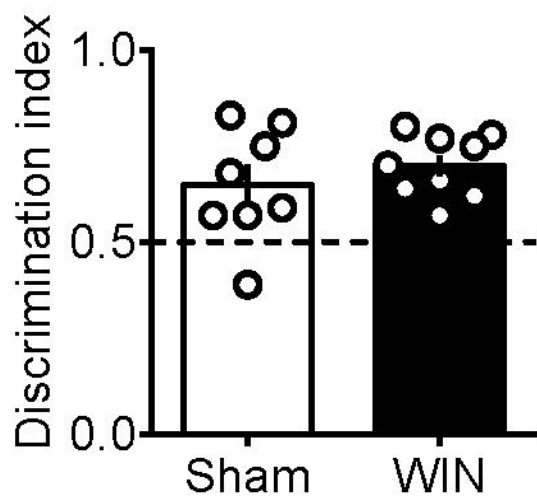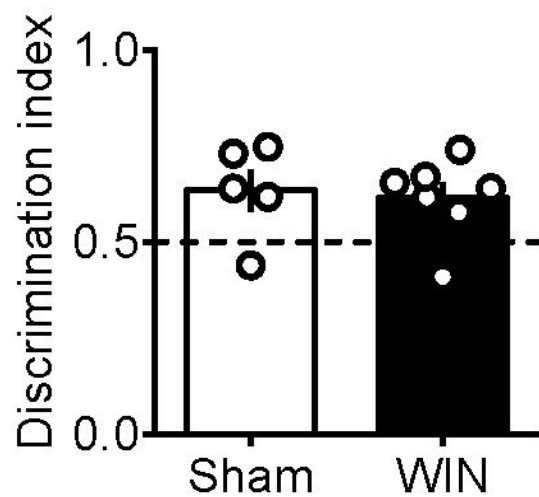

## Pubescents

## Adults

### A

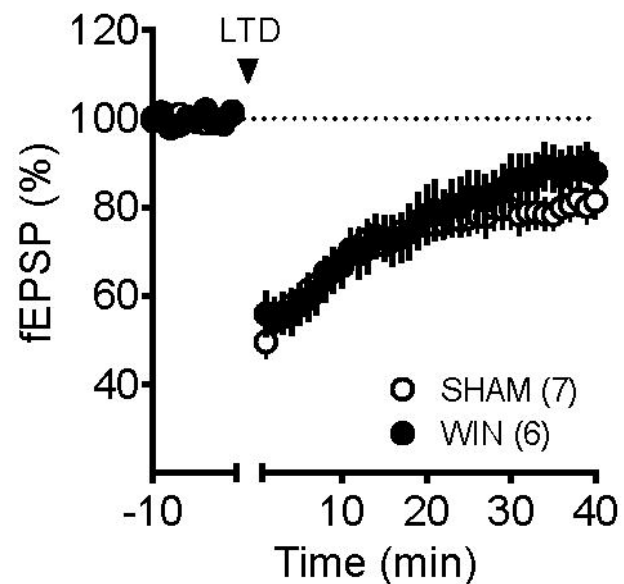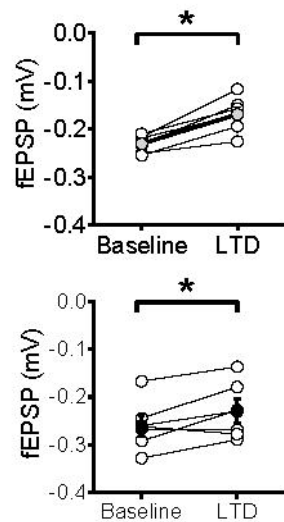

### B

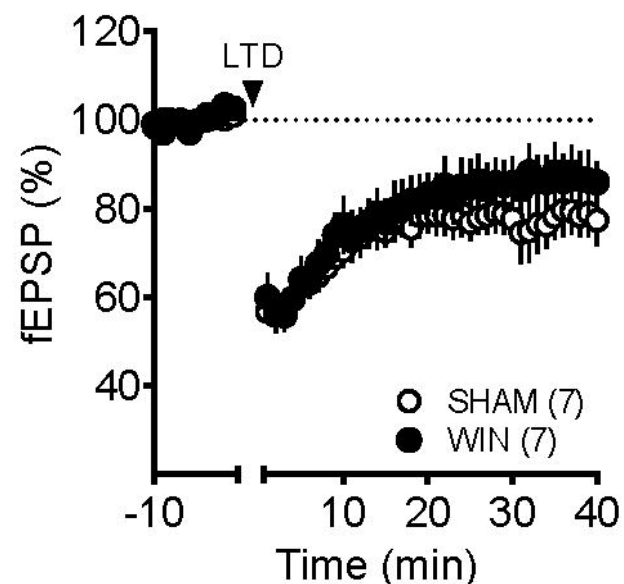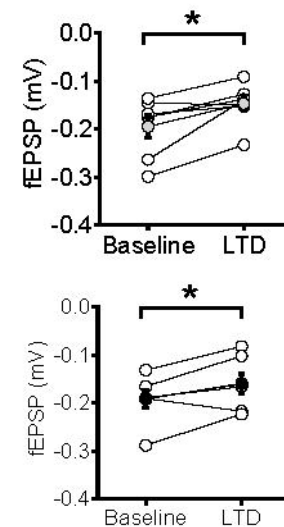

### C

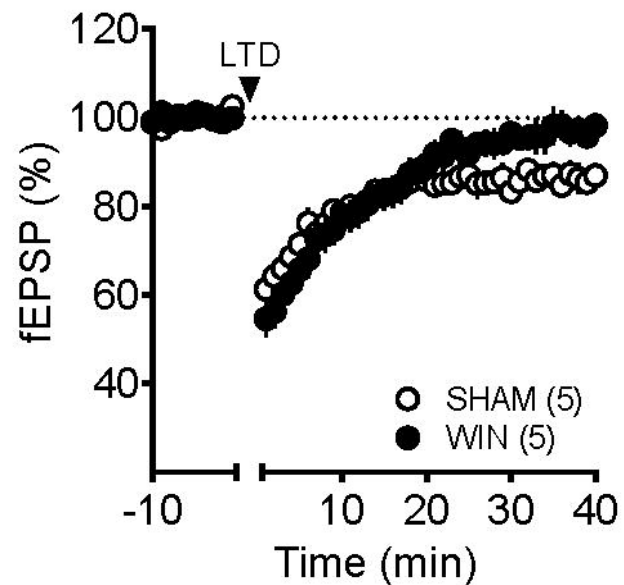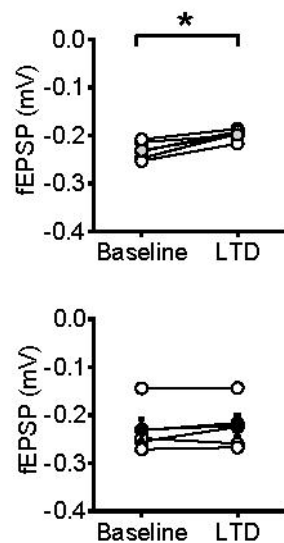

### D

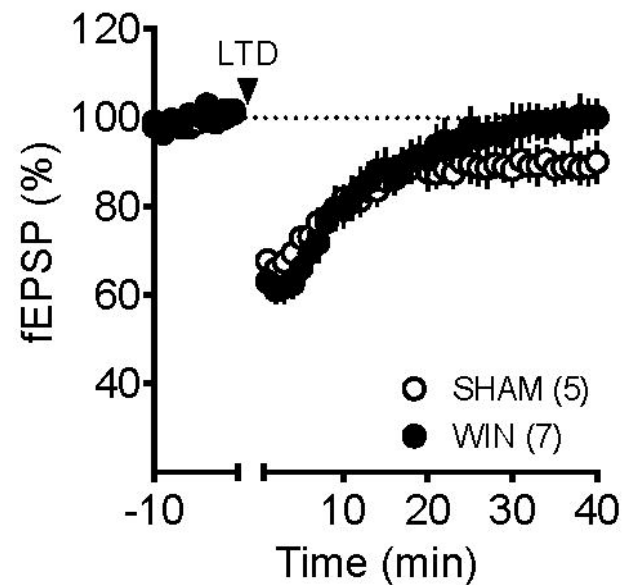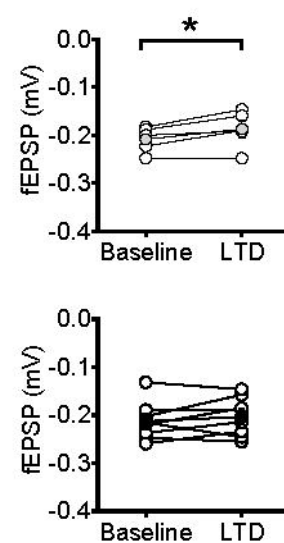

## Pubescent

## Adults

### A

### B

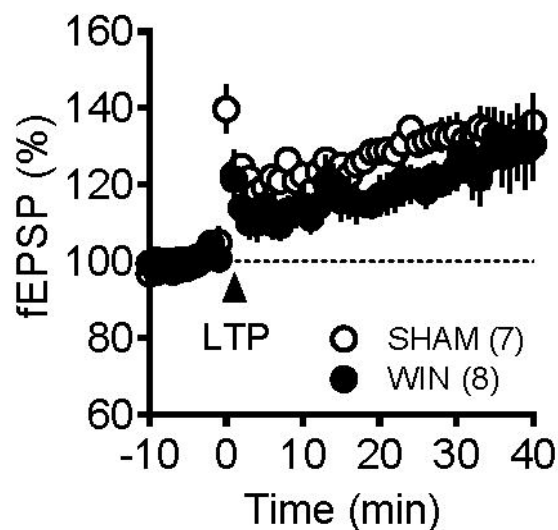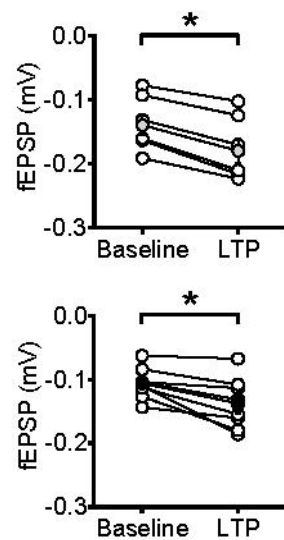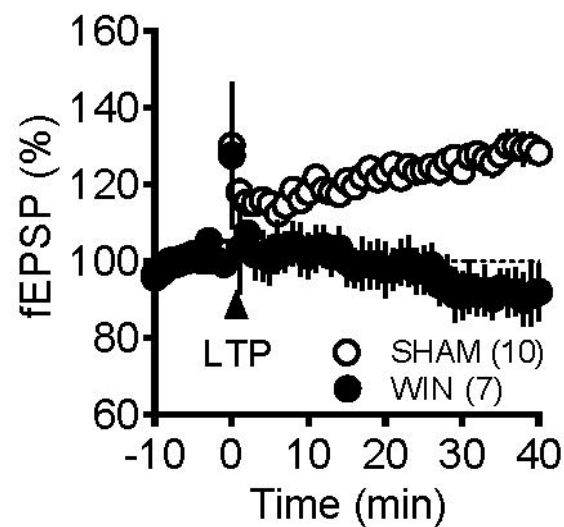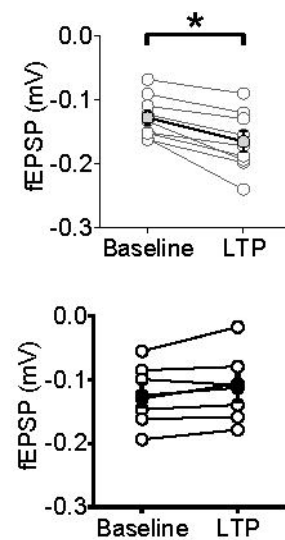

### C

### D

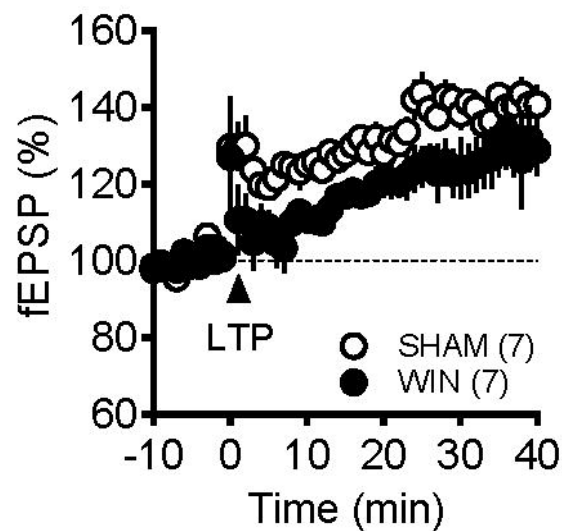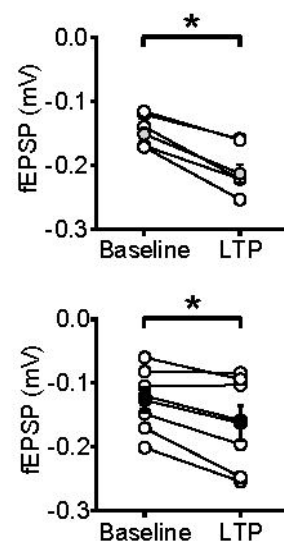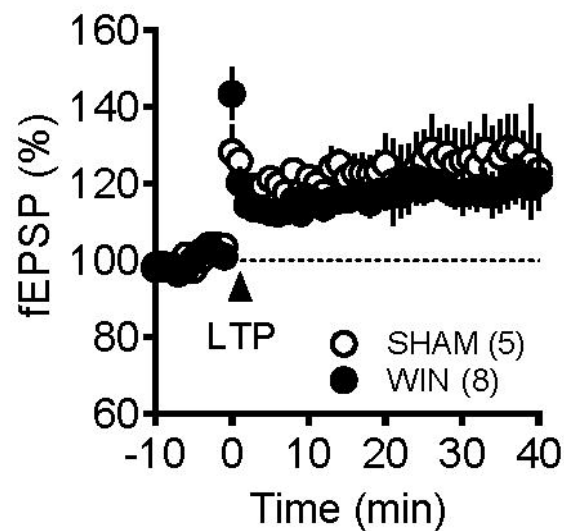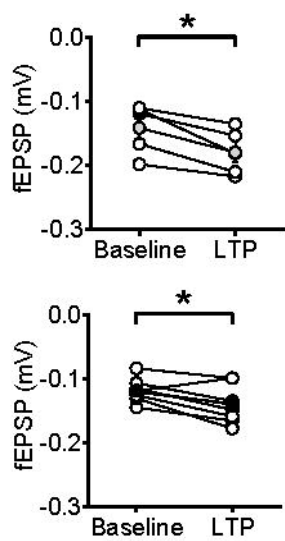

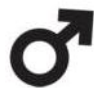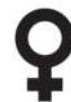

bioRxiv preprint doi: <https://doi.org/10.1101/415067>; this version posted September 12, 2018. The copyright holder for this preprint (which was not certified by peer review) is the author/funder. All rights reserved. No reuse allowed without permission.

**A**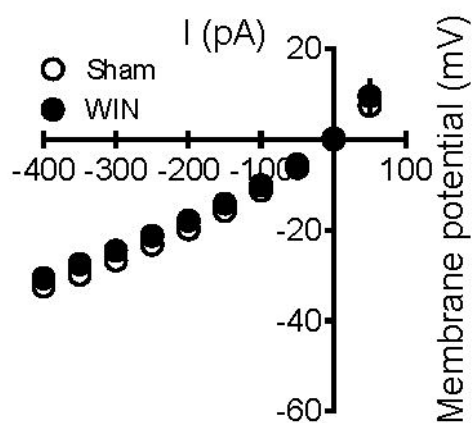**B**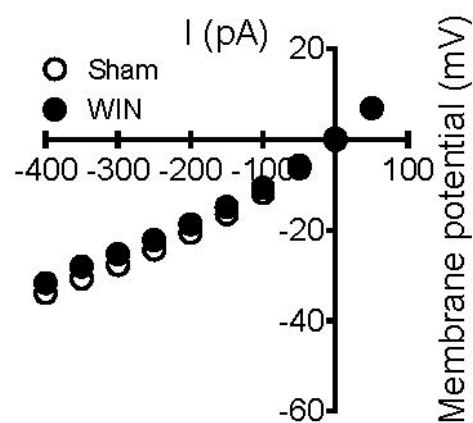**C**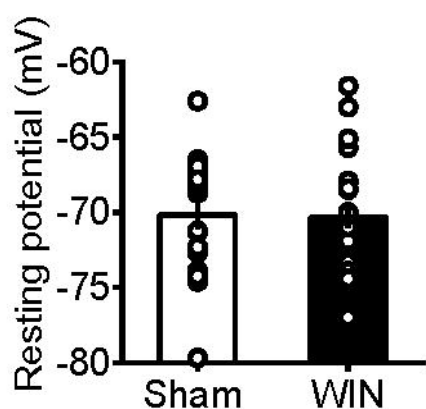**D**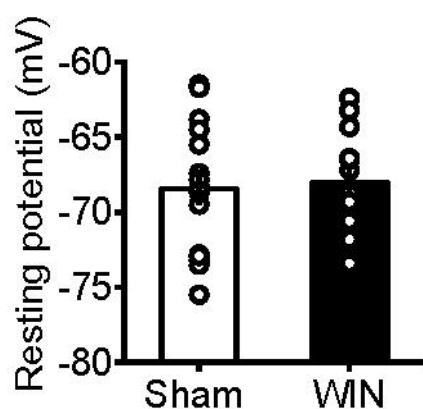**E**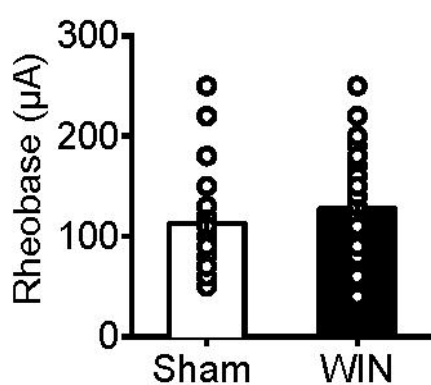**F**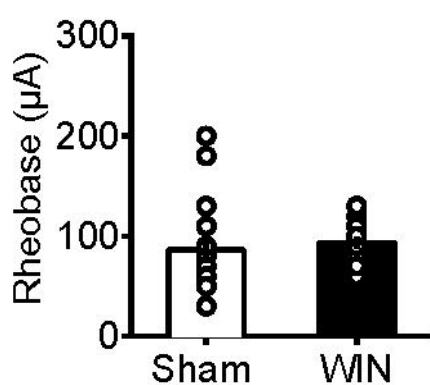**G**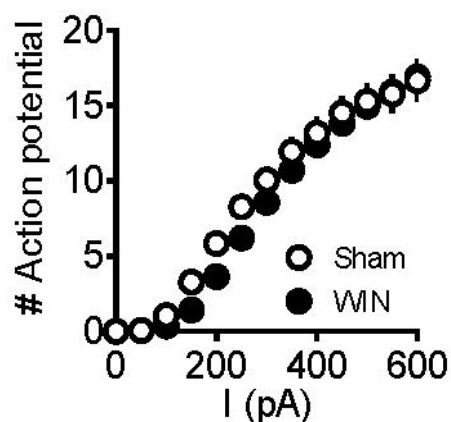**H**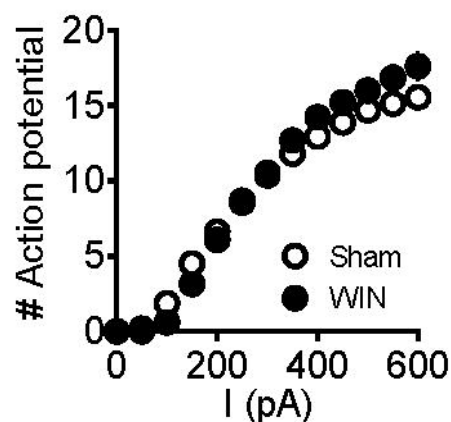

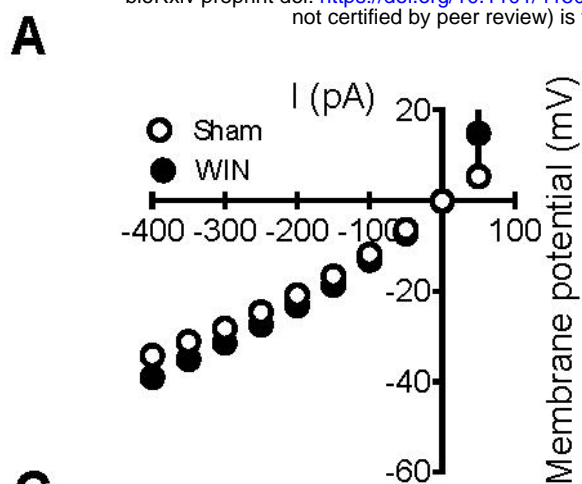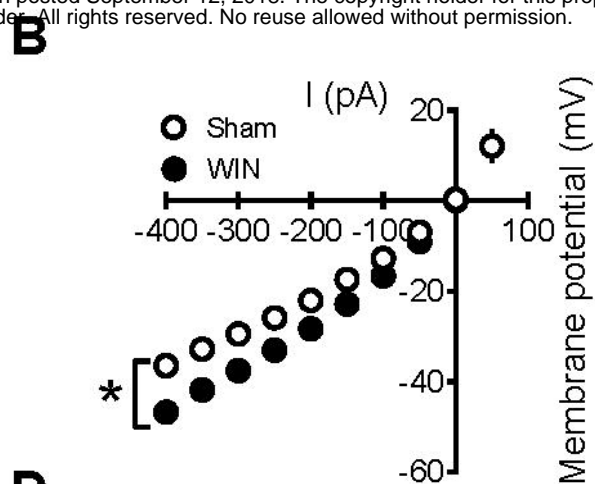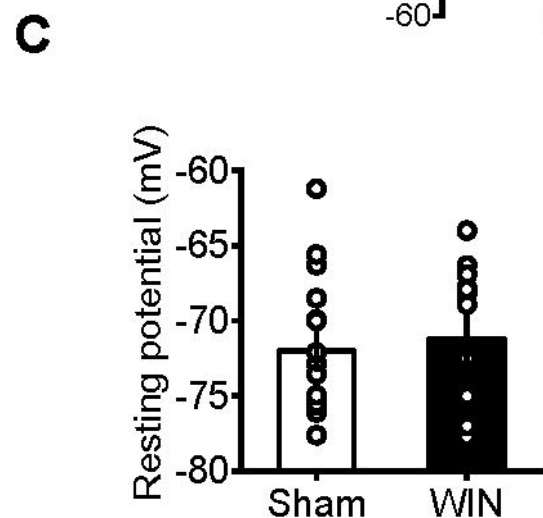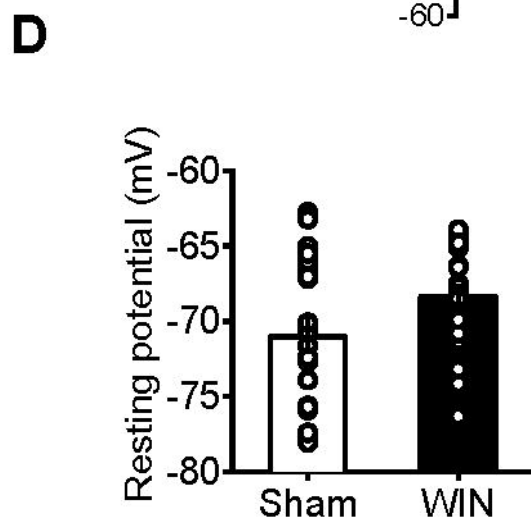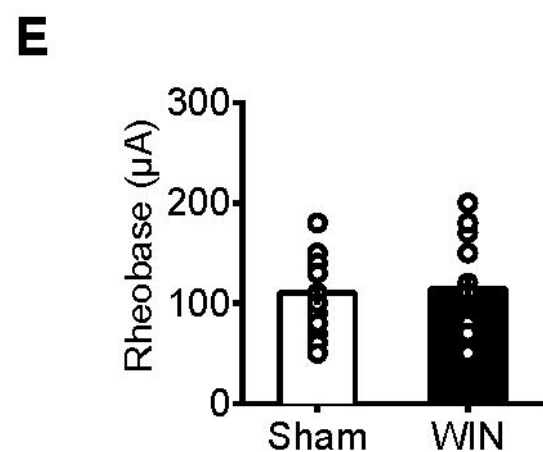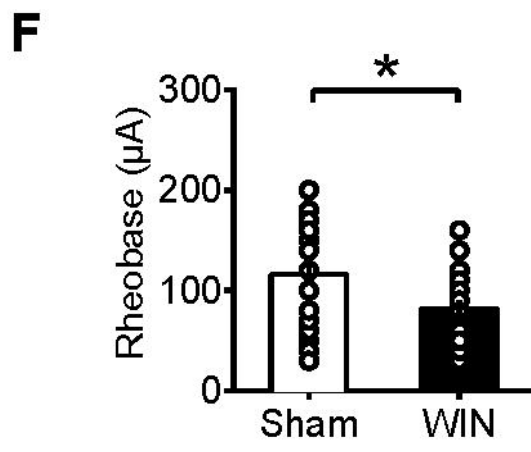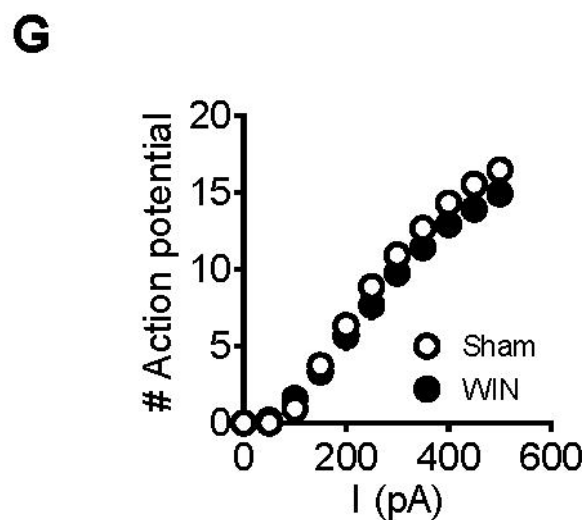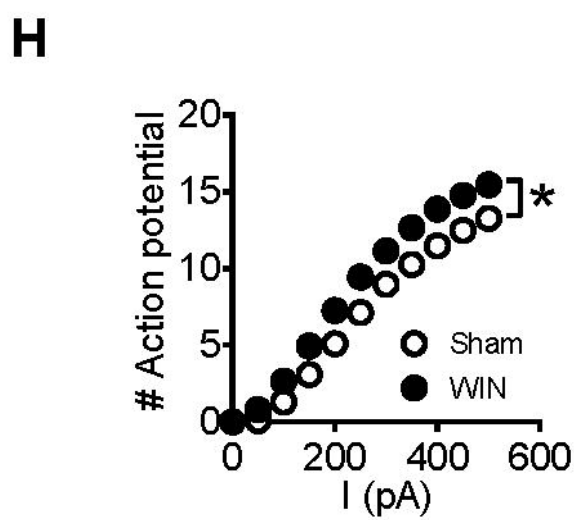

Source: https://www.biorxiv.org/content/10.1101/415067v1.full.pdf
